# Supplementary material
Source: PubMed Central journal article supplement (PMC8166193)
Supplement: pnas.2002486118.sapp.pdf [file pnas.2002486118.sapp.pdf]

# Supporting Information

Chen et al.

## SI Experimental Procedures

**Chemicals and reagents.** BI-D1870, BI-2536, volasertib, palbociclib hydrochloride, GDC-0941, SAR405 were purchased from Cayman Chemical. Insulin was purchased from Sigma Aldrich. Rapamycin and metformin hydrochloride were purchased from Abcam. N-acetyl-L-cysteine (NAC) was purchased from MP Biomedical. 1,2-dipalmitoyl-sn-glycero-3-phosphoserine, or DPPS, and D-myo-phosphatidylinositol 5-phosphate diC16, or PI(5)P, were purchased from Echelon Biosciences.

**Protein purification, crystallization and structure determination.** A construct of PI5P4K $\alpha$  containing residues 33-405 was subcloned (Nde1, Xho1) from MGC-26205 clone into pET28a, which installed an N-terminal His-tag. The protein was expressed in *E. coli* BL21(DE3) cells and purified by metal affinity chromatography. After removing the His-tag by thrombin, the protein was further purified by gel filtration (1). A 20mg/ml protein solution in 20mM Tris-HCl pH 7.4, 500mM NaCl and 5mM DTT was used for hanging drop crystallization. Screen of commonly used kits identified two conditions that yielded large single crystals at room temperature: index G4 (0.2M Li<sub>2</sub>SO<sub>4</sub>, 0.1M HEPES pH 7.5, 25% PEG 3,350) and index F8 (0.2M (NH<sub>4</sub>)<sub>2</sub>SO<sub>4</sub>, 0.1M HEPES pH 7.5, 25% PEG 3,350). Crystals were cryoprotected in 20% glycerol before being flash frozen in liquid nitrogen. To generate the complex with nucleotide, the crystal was soaked overnight in a pseudo-mother liquor supplemented with 1mM AMP-PNP and 2mM MnCl<sub>2</sub> before the cryoprotection steps. To generate complex with various inhibitors, 1mM compound was

used in all soaking steps (crystals were from the G4 condition). Diffraction data were collected at synchrotrons (APS 24-ID-C/E, SSRL BL14-1, NSLS X29) and processed using HKL2000 (2) (Tables S1 and S2). Molecular replacement using PDB entry 2ybx and refinement were performed using CCP4i (3), and graphic modeling was carried out in Coot (4). Models of small-molecule inhibitors were initially generated using the PRODRG server (5). All figures illustrating the crystal structures were generated by PyMOL.

The construct of human PI5P4K $\beta$  used for crystallization (residues 32-416) was inserted into pET28a using the In-Fusion Cloning Kits (Clontech) from a synthesized full-length gene codon-optimized for *E. coli*. The protein was preceded by an N-terminal His-tag and PreScission protease site. Expression and purification were similar to those described for PI5P4K $\alpha$  (except PreScission protease was used to remove His-tag). Co-crystallization with CC260 was achieved at room temperature using a sitting drop format: the protein solution contains 16mg/ml PI5P4K $\beta$ , 20mM Tris-HCl pH 7.4, 0.5M NaCl, 5mM DTT and 1mM CC260; the well solution contains 20mM CaCl<sub>2</sub>, 0.2M NaBr and 20% PEG 3,350. The apo protein was crystallized similarly except the well solution contains 0.15M DL-malic acid pH 7.0 and 20% PEG 3,350. Crystals were cryoprotected in 20% glycerol, and diffraction data were collected at APS 24-ID-C. The structure was solved by molecular replacement using PDB entry 1bo1(6) (Table S3). The human PI5P4K $\gamma$  construct, similarly purified, contains residues 32-421.

Purified PI5P4K $\alpha$ <sup>33-405</sup>, PI5P4K $\beta$ <sup>1-416</sup> and PI5P4K<sup>32-421</sup> (all with His-tag) were used for *in vitro* activity and binding assays and for high-throughput screening. All the mutants

were generated by QuikChange site-directed mutagenesis (Agilent Technologies) and purified similarly.

**Chemical synthesis and characterization.** Unless otherwise noted, all reagents were obtained from commercial suppliers and used without further purification (Fig. S6A). Reaction progress was monitored by UV/MS on an Agilent 6120 Quadrupole HPLC/MSD and Agilent 1260 Infinity. Organic extracts were dried over MgSO<sub>4</sub> and then concentrated under reduced pressure. Flash-column chromatography was performed on a Teledyne ISCO automated chromatography system using either normal phase RediSep Rf silica gel cartridges or reverse phase RediSep Rf 50g C18 silica gel cartridges. Methanol-*d*<sub>4</sub> and Chloroform-*d*<sub>3</sub> were obtained from commercial sources and used as received. NMR chemical shifts are reported in ppm relative to CD<sub>3</sub>OD (3.31, 4.78 ppm <sup>1</sup>H and 49.0 ppm <sup>13</sup>C) and CDCl<sub>3</sub> (1.56, 7.26 ppm <sup>1</sup>H and 77.16 ppm <sup>13</sup>C). HRMS were obtained on an Agilent 6550 iFunnel QTOF LCMS.

*(R)*-8-Cyclopentyl-7-(cyclopentylmethyl)-2-((3,5-dichloro-4-hydroxyphenyl)amino)-5-methyl-7,8-dihydropteridin-6(5H)-one (**CC260**). To a round bottom flask equipped with a stir bar was added **1a** (3.00 g, 19.1 mmol) in methanol (19 mL). The solution was cooled to 0 °C, and SOCl<sub>2</sub> (2.90 mL, 40.1 mmol) was added dropwise. The reaction mixture was then refluxed for 2 h and then concentrated. The remaining oil was diluted with *tert*-butyl methyl ether (20 mL) and stirred for 30 min at rt. The precipitate was filtered and washed with diethyl ether and dried under vacuum to give **2a** (3.77 g, quant.). The product was used in the next step without further purification. <sup>1</sup>H NMR (400 MHz, CD<sub>3</sub>OD) δ 3.99 (t, *J* = 6.7 Hz, 1H), 3.84 (s, 3H), 2.06 – 1.79 (m, 5H), 1.76 – 1.54 (m, 4H), 1.09-

1.25 (m, 2H).  $^{13}\text{C}$  NMR (101 MHz,  $\text{CD}_3\text{OD}$ )  $\delta$  171.32, 53.60, 37.91, 37.13, 33.39, 33.35, 26.04, 25.82. HRMS-ESI ( $m/z$ ):  $[\text{M}+\text{H}]^+$  calcd. for  $\text{C}_9\text{H}_{17}\text{NO}_2$ , 172.1337; found 172.1325.

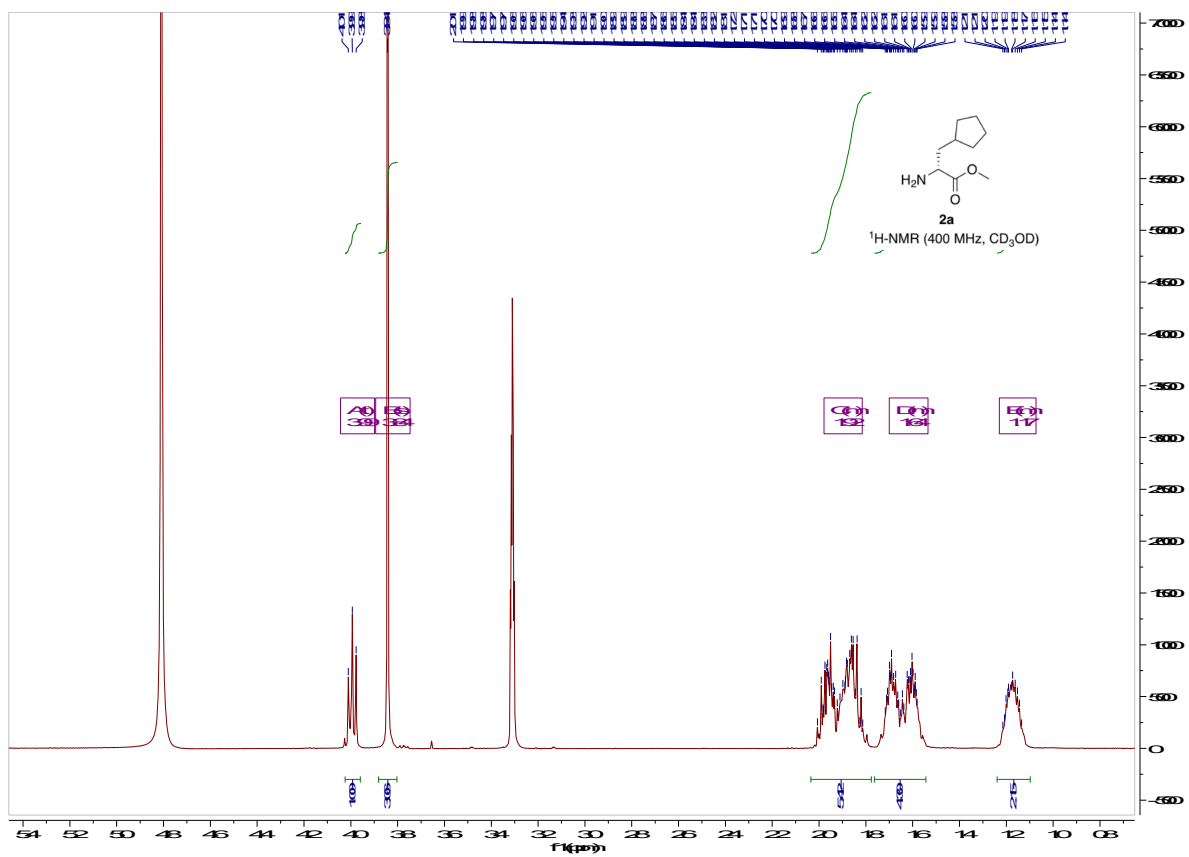



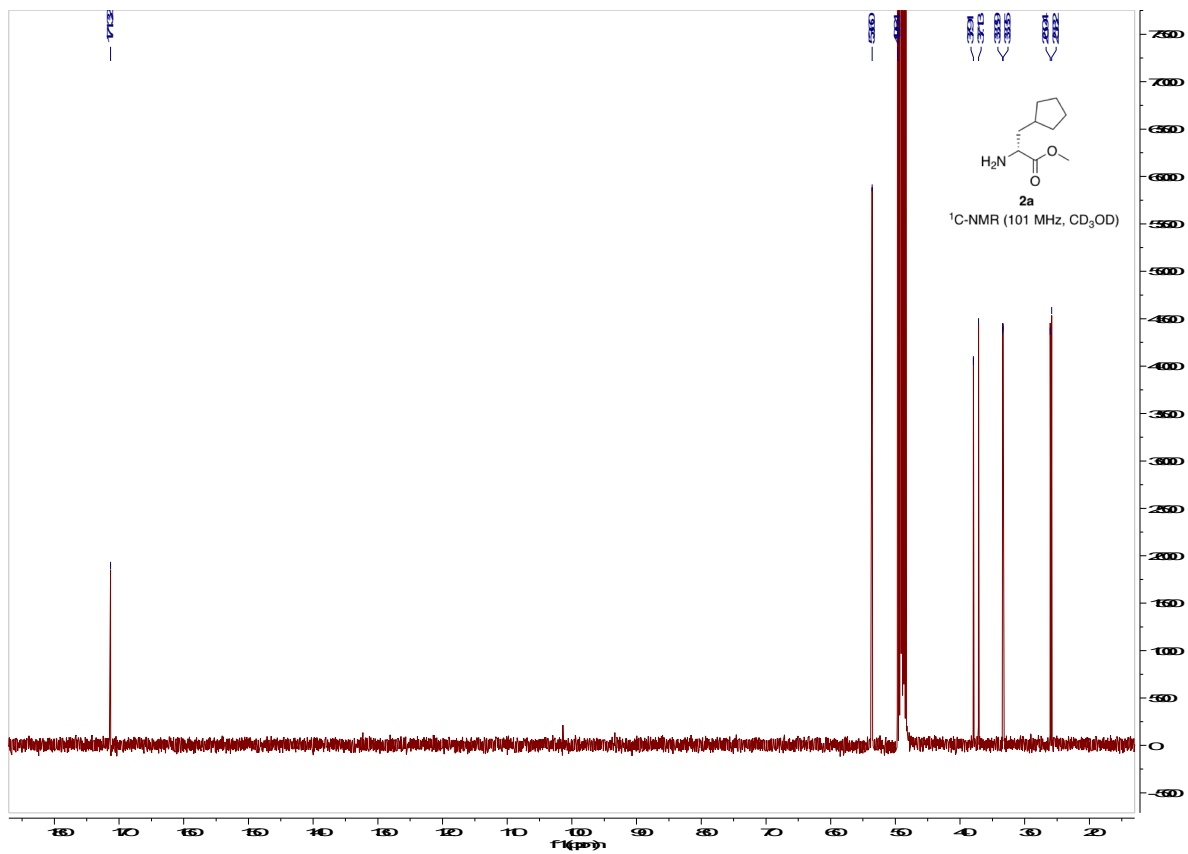

Methyl ester **2a** (3.77 g, 22 mmol) was dissolved in CH<sub>2</sub>Cl<sub>2</sub> (37 mL) and cooled to 0 °C. Cyclopentanone (4.87 mL, 55 mmol), sodium acetate (1.86 g, 22.7 mmol), and sodium triacetoxyborohydride (6.90 g, 32.6 mmol) were subsequently added to the solution. The reaction mixture was stirred and allowed to warm to rt over 1 h. The reaction mixture was diluted with sat. NaHCO<sub>3</sub> and extracted with CH<sub>2</sub>Cl<sub>2</sub>. The organics were washed with water, dried, and concentrated to afford **3a** (4.95 g) which was used in the next step without further purification. <sup>1</sup>H NMR (400 MHz, CD<sub>3</sub>OD) δ 3.76 (s, 3H), 3.34 (t, *J* = 7.9, 6.4 Hz, 1H), 3.01 (p, *J* = 6.9 Hz, 1H), 2.28 – 2.13 (m, 2H), 2.09 – 1.96 (m, 2H), 1.92 – 1.78 (m, 1H), 1.79 – 1.72 (m, 2H), 1.72 – 1.64 (m, 4H), 1.64 – 1.53 (m, 4H), 1.44 – 1.30

(m, 2H), 1.24 – 1.09 (m, 2H). HRMS-ESI ( $m/z$ ):  $[M+H]^+$  calcd. for  $C_{14}H_{25}NO_2$ , 240.1963; found 240.1954.

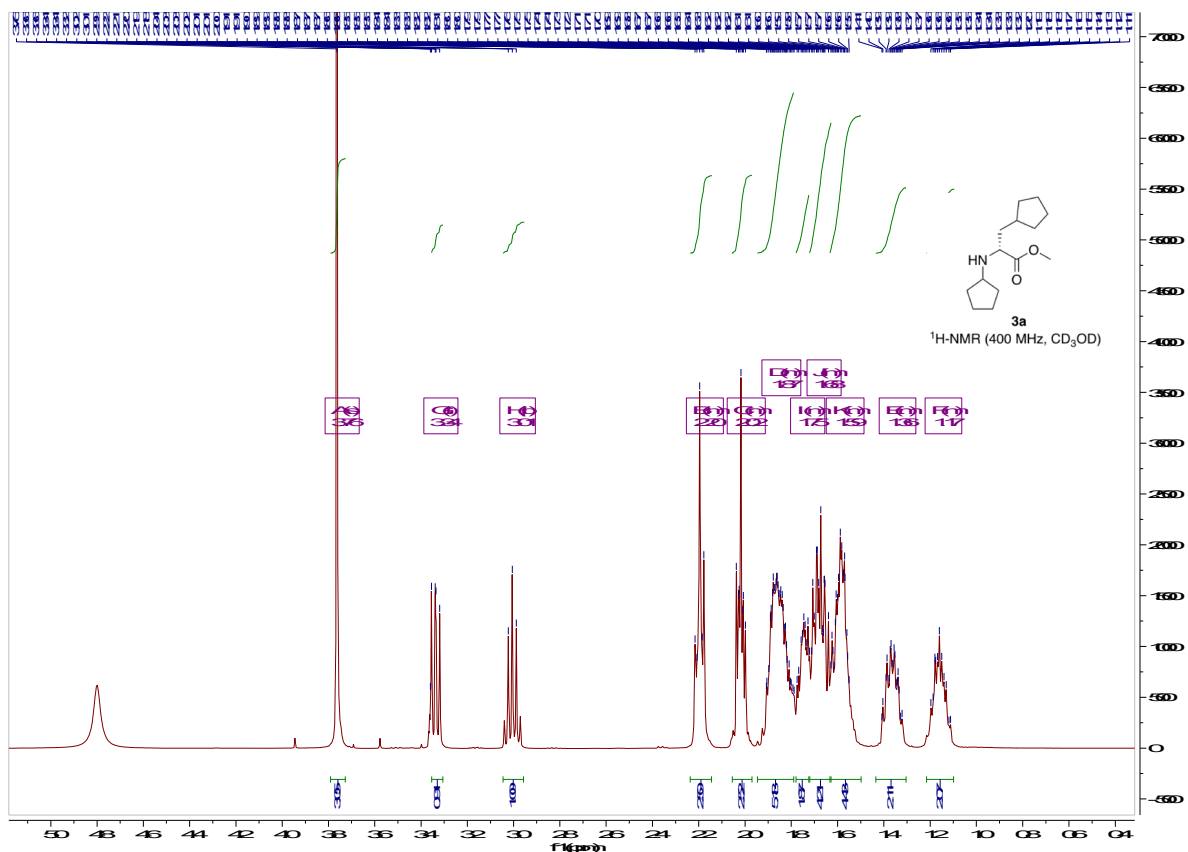

To a flame dried and  $N_2$  flushed round bottom flask was added **3a** (4.81 g, 20.1 mmol) dissolved in dry acetone (50 mL). The solution was cooled to  $0^\circ C$ , and then  $K_2CO_3$  (3.06 g, 22.1 mmol) and 2,4-dichloro-5-nitropyrimidine (4.29 g, 22.1 mmol dissolved in acetone) were added. The reaction mixture was stirred overnight at rt. Solvent was removed under reduced pressure. The residue was diluted with water, extracted with ethyl acetate, dried and concentrated. The crude product was purified by silica gel column chromatography eluting with 0-30% ethyl acetate in hexane to give **4a** (2.01 g). The product was however still contaminated with some impurities that were removed during purification in the next step.

Next, **4a** (2.01 g, 5.08 mmol) was dissolved in glacial acetic acid (11.5 mL) and reacted with Fe powder (696 mg, 12.5 mmol). The reaction mixture was stirred for 4 h at 100 °C. The solution was filtered through Celite, and after concentration, the crude product was purified by silica gel column chromatography eluting with 0-60% ethyl acetate in hexane to give **5a** (1.40 g). <sup>1</sup>H NMR (400 MHz, CD<sub>3</sub>OD) δ 7.58 (s, 1H), 4.32 – 4.14 (m, 2H), 2.12 – 1.39 (m, 17H), 1.31 – 0.93 (m, 2H). <sup>13</sup>C NMR (101 MHz, CD<sub>3</sub>OD) δ 166.93, 154.35, 153.09, 139.00, 120.66, 61.71, 61.65, 40.54, 37.24, 34.53, 33.32, 30.39, 30.13, 26.16, 25.82, 25.25, 25.13. HRMS-ESI (*m/z*): [M+H]<sup>+</sup> calcd. for C<sub>17</sub>H<sub>23</sub>ClN<sub>4</sub>O, 335.1638; found 335.1627.

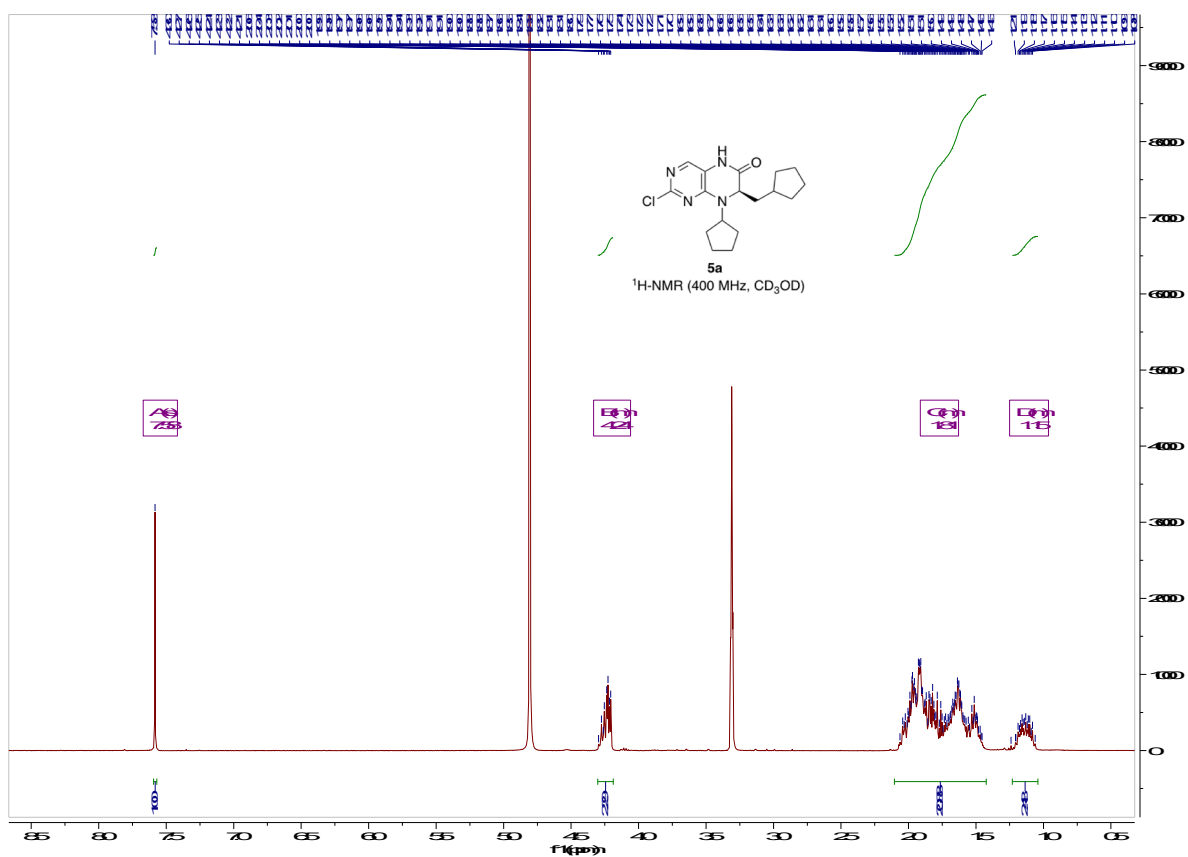



121.61, 59.32, 59.25, 39.76, 36.02, 33.63, 32.23, 29.79, 29.64, 28.58, 25.37, 25.00, 24.10, 23.73. HRMS-ESI ( $m/z$ ):  $[M+H]^+$  calcd. for  $C_{18}H_{25}ClN_4O$ , 349.1795; found 349.1779.

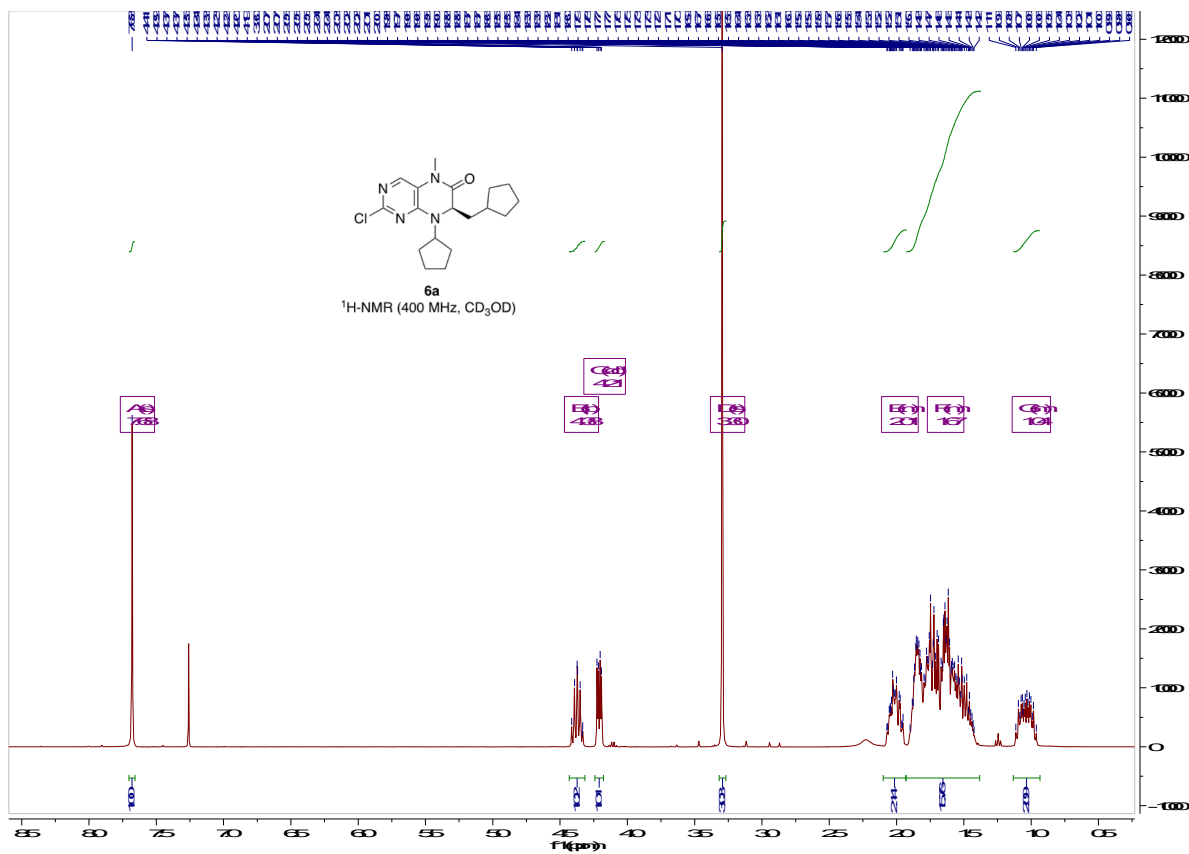

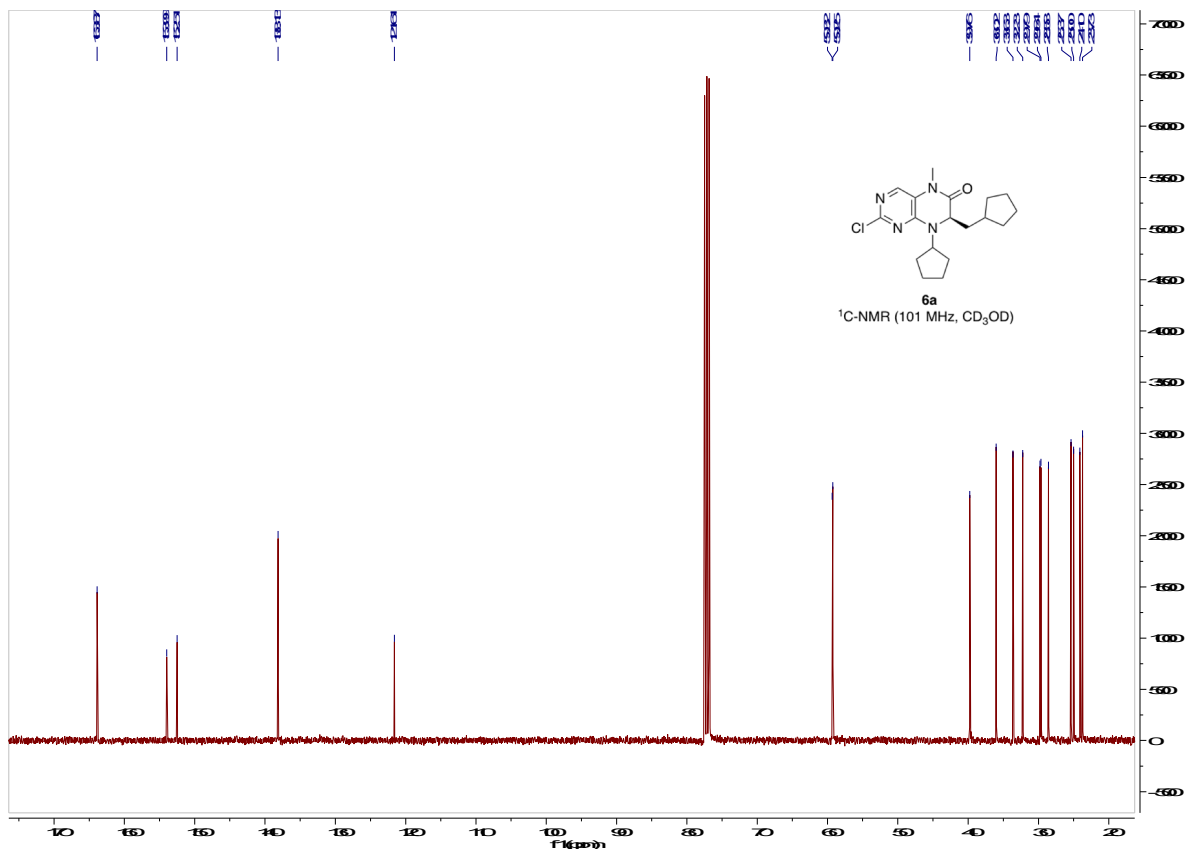

The enantiomeric purity of **6a** was determined using chiral HPLC analysis (Chiralpak IB, 90:10 hexanes:isopropanol, 1mL/min flow rate, detection at 250 nm) against its (*S*)-enantiomer.  $t_R$  of **6a** = 8.08 min;  $t_R$  of (*S*)-**6a** = 7.05 min. Chiral HPLC analysis showed that **6a** exists as a single enantiomer with >99:1 enantiomer ratio).

The methylated pteridine intermediate **6a** (330 mg, 1.0 mmol) and 4-amino-2,6-dichlorophenol (279 mg, 1.57 mmol) were suspended in a 1:4 mixture of ethanol and water. To this mixture was added conc. HCl (181  $\mu$ L, 2.11 mmol), and the reaction mixture was refluxed overnight. The mixture was cooled down to rt, and the volatiles were evaporated. The crude product was then purified by reverse phase chromatography

(gradient elution: 10-100% MeCN in H<sub>2</sub>O + 0.1% TFA) to yield **CC260** (380 mg) upon lyophilization.

Characterization of **CC260** (for NMR spectra see, Fig. S6B, C): <sup>1</sup>H NMR (500 MHz, CD<sub>3</sub>OD) δ 7.54 (s, 1H), 7.44 (s, 2H), 4.43 (dd, *J* = 8.3, 3.6 Hz, 1H), 4.27 (m, 1H), 3.27 (s, 3H), 2.09 – 1.42 (m, 17H), 1.17 – 1.04 (m, 2H). <sup>13</sup>C NMR (151 MHz, CD<sub>3</sub>OD) δ 164.60, 154.40, 150.97, 149.01, 130.50, 125.39, 124.24, 123.50, 117.73, 63.05, 61.80, 41.09, 36.85, 34.55, 33.02, 29.75, 29.72, 28.95, 26.28, 25.81, 24.36, 24.27. HRMS-ESI (*m/z*): [M+H]<sup>+</sup> calcd. for C<sub>24</sub>H<sub>29</sub>Cl<sub>2</sub>N<sub>5</sub>O<sub>2</sub>, 490.1776, found 490.1776.

Preparation of *N,O*-dimethylated derivative of **CC260** and **(S)-CC260** for chiral HPLC analysis. To a 20 mL vial equipped with a stir bar and cooled to 0°C was added **CC260** (27 mg, 0.054 mmol) in DMF (1 mL). NaH (7 mg, 0.304 mmol, 60% dispersion in mineral oil) and CH<sub>3</sub>I (19 mL, 0.304 mmol) were subsequently added. The reaction mixture was stirred for 10 min at 0°C, and then for 30 min at rt. The reaction was then quenched with water, and the resulting mixture was extracted with ethyl acetate. The residue was washed with water three times. The combined organic layer was dried and concentrated. The crude product was purified by silica gel column chromatography eluting with 0-40% ethyl acetate in hexane to afford the ***N,O*-dimethylated derivative of CC260** (20 mg). A similar procedure was carried out to synthesize the ***N,O*-dimethylated derivative of (S)-CC260** (14 mg) using **(S)-CC260** (20 mg, 0.0408 mmol), NaH (5 mg, 0.217 mmol), and CH<sub>3</sub>I (13.5 μL, 0.217 mmol). The enantiomeric purity of the ***N,O*-dimethylated derivative of CC260** was determined using chiral HPLC analysis (Chiralpak AD-H, 90:10 hexanes:isopropanol, 1mL/min flow rate, detection at 254 nm) against its **(S)-enantiomer**. *t<sub>R</sub>* of ***N,O*-dimethylated derivative of CC260** = 6.20 min; *t<sub>R</sub>*

of **(S)**-enantiomer = 7.74 min. Chiral HPLC analysis of the dimethylated derivative established that **CC260** has high enantiomeric purity (>97/3 enantiomer ratio) (see Fig. S7 for chiral HPLC traces).

*(R)*-7-(Cyclohexylmethyl)-8-cyclopentyl-2-((3,5-dichloro-4-hydroxyphenyl)amino)-5-methyl-7,8-dihydropteridin-6(5H)-one (**CC314**). **CC314** was prepared in a similar manner as described for **CC260** using **1b** (3.0 g, 17.5 mmol) to give **2b** (2.98 g). The entire amount of **2b** was converted to **3b** (4.18 g). The S<sub>N</sub>Ar reaction of **3b** yielded **4b** (2.49 g), which upon cyclization and methylation afforded **5b** (1.49 g) and **6b** (1.17 g), respectively. A portion of **6b** (200 mg, 0.551 mmol) was taken forward to give 254 mg of **CC314** after purification by reverse phase chromatography (gradient elution: 10-100% MeCN in H<sub>2</sub>O + 0.1% TFA) and lyophilization.

Characterization of **CC314** by NMR and MS: <sup>1</sup>H NMR (500 MHz, CD<sub>3</sub>OD) δ 7.55 (s, 1H), 7.44 (s, 2H), 4.44 (dd, *J* = 9.7, 4.0 Hz, 1H), 4.38 – 4.27 (m, 1H), 3.28 (s, 3H), 2.08 – 1.80 (m, 5H), 1.76 – 1.51 (m, 10H), 1.43 – 1.32 (m, 1H), 1.31 – 1.11 (m, 3H), 1.03 – 0.87 (m, 2H). <sup>13</sup>C NMR (151 MHz, CD<sub>3</sub>OD) δ 164.55, 154.53, 151.37, 149.04, 130.56, 125.50, 125.16, 123.53, 117.90, 62.68, 59.95, 42.73, 35.23, 35.21, 33.35, 30.12, 29.91, 28.98, 27.35, 27.28, 27.05, 24.49, 24.24. HRMS-ESI (*m/z*): [M+H]<sup>+</sup> calcd. for C<sub>25</sub>H<sub>31</sub>Cl<sub>2</sub>N<sub>5</sub>O<sub>2</sub>, 504.1933, found 504.1919.





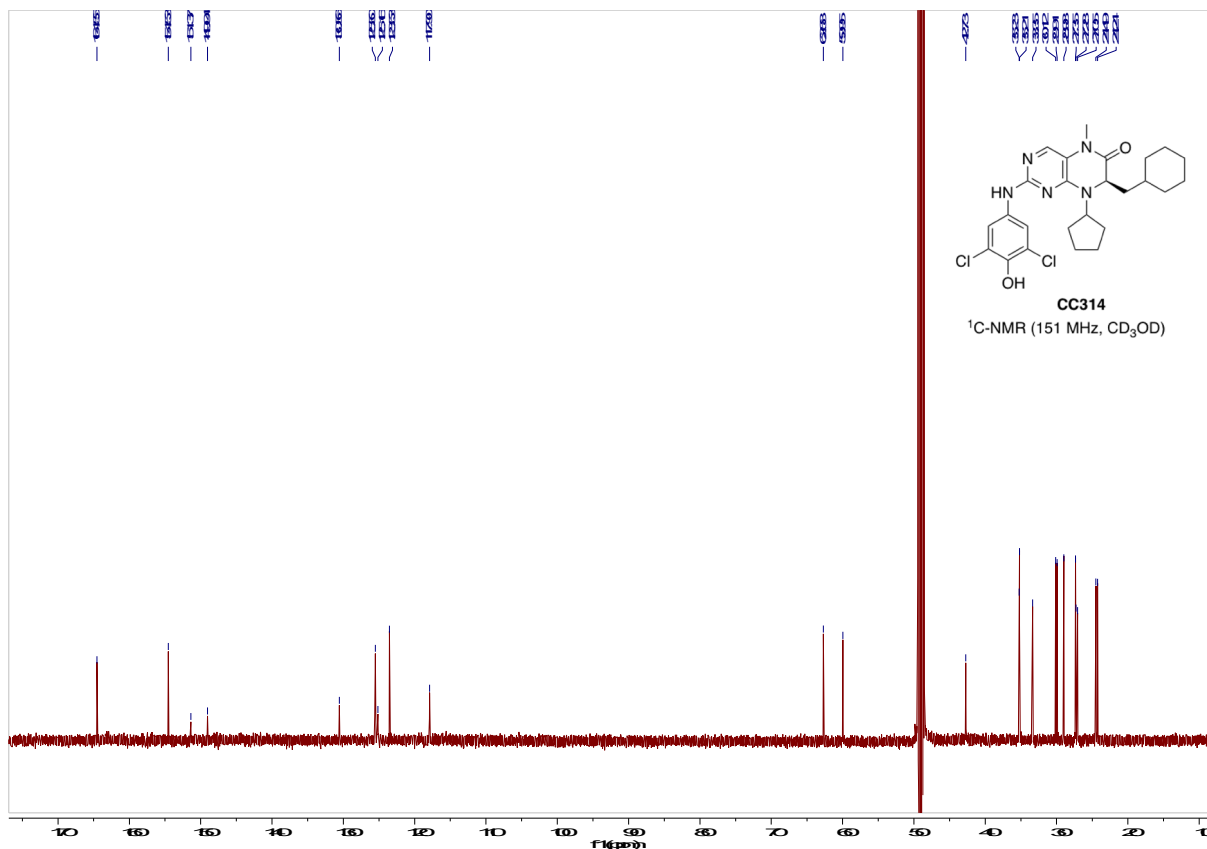

(*R*)-8-Cyclopentyl-2-((3,5-dichloro-4-hydroxyphenyl)amino)-7-isopropyl-5-methyl-7,8-dihydropteridin-6(5*H*)-one (**CC262**). **CC262** was prepared in a similar manner as described for **CC260** using **1c** (1.0 g, 8.54 mmol) to give **2c** (1.01 g). The entire amount of **2c** was converted to **3c** (810 mg). The S<sub>N</sub>Ar reaction of **3c** yielded **4c** (220 mg), which upon cyclization and methylation afforded **5c** (110 mg) and **6c** (40 mg), respectively. **6c** (40 mg, 0.130 mmol) was reacted with 4-amino-2,6-difluorophenol (28.2 mg, 0.194 mmol) to give 11 mg of pure fractions of **CC262** after purification by reverse phase chromatography (gradient elution: 10-100% MeCN in H<sub>2</sub>O + 0.1% TFA) and lyophilization.

Characterization of **CC262** by NMR and MS: <sup>1</sup>H NMR (600 MHz, CD<sub>3</sub>OD) δ 7.47 (s, 1H), 7.13 – 7.05 (m, 2H), 4.29 (d, *J* = 3.5 Hz, 1H), 4.17 (m, 1H), 3.29 (s, 3H), 2.30 –

2.22 (m, 1H), 2.10 – 2.01 (m, 2H), 1.98 – 1.89 (m, 2H), 1.70 – 1.63 (m, 2H), 1.60-1.51 (m, 2H), 1.13 (d,  $J = 6.9\text{Hz}$ , 3H), 0.80 (d,  $J = 6.9$ , 3H).  $^{19}\text{F}$  NMR (470 MHz,  $\text{CD}_3\text{OD}$ )  $\delta$  -134.57. HRMS-ESI ( $m/z$ ):  $[\text{M}+\text{H}]^+$  calcd. for  $\text{C}_{21}\text{H}_{25}\text{F}_2\text{N}_5\text{O}_2$ , 418.2059; found 418.2056.

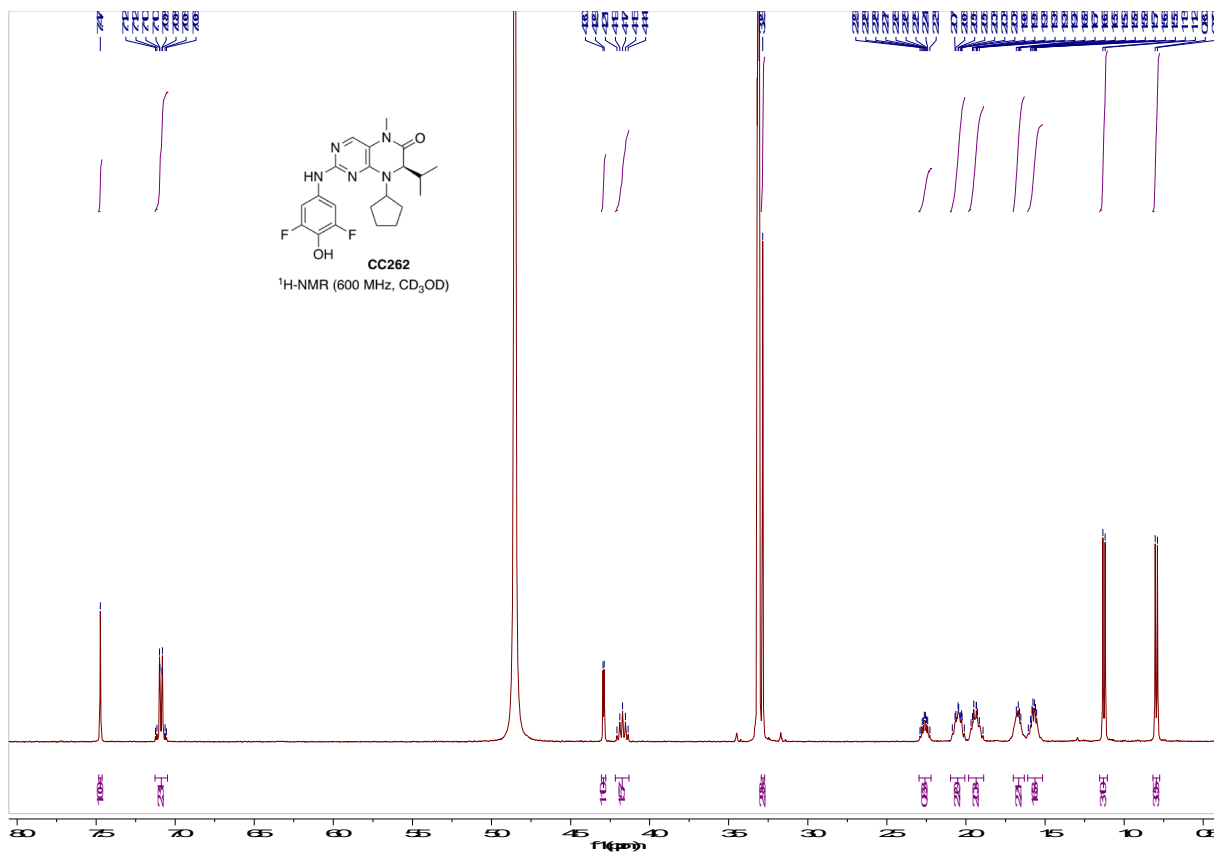

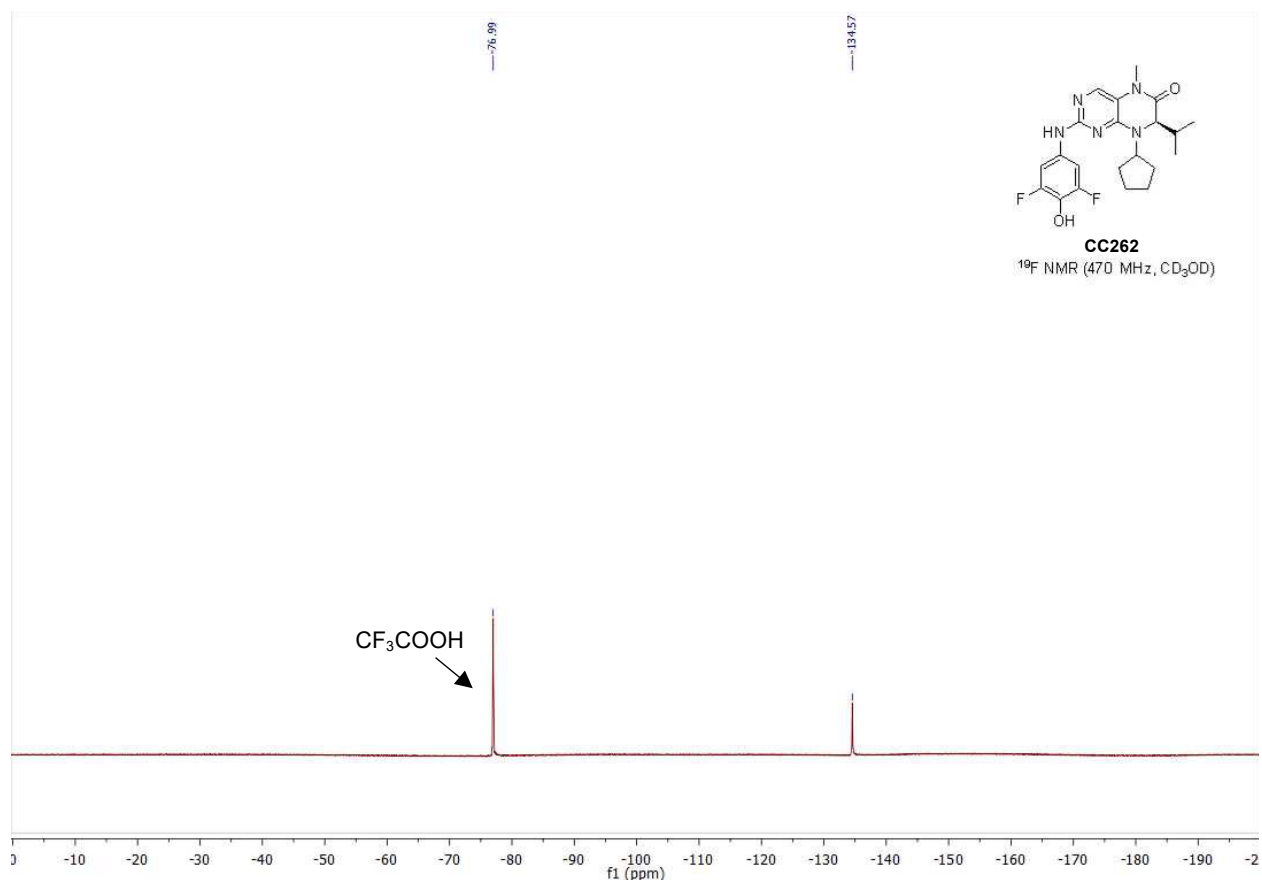

*(R)*-8-Cyclopentyl-2-((3,5-dichloro-4-hydroxyphenyl)amino)-7-isobutyl-5-methyl-7,8-dihydropteridin-6(5H)-one (**CC259**). **CC259** was prepared in a similar manner as described for **CC260** using **1d** (12 g, 91.5 mmol) to give **2d** (15.9 g). The entire amount of **2d** was converted to **3d** (21.5 g). The  $S_NAr$  reaction of **3d** yielded **4d** (6.26 g), which upon cyclization and methylation afforded **5d** (2.16 g) and **6d** (1.17 g), respectively. A portion of **6d** (506 mg, 1.57 mmol) was taken forward to give 690 mg of **CC259** after purification by reverse phase chromatography (gradient elution: 10-100% MeCN in H<sub>2</sub>O + 0.1% TFA) and lyophilization.

Characterization of **CC259** by NMR and MS: <sup>1</sup>H NMR (400 MHz, CD<sub>3</sub>OD)  $\delta$  7.67 (s, 1H), 7.54 (s, 2H), 4.44 (p,  $J = 7.7$  Hz, 1H), 4.32 (dd,  $J = 10.0, 3.9$  Hz, 1H), 3.29 (s, 3H), 2.11 – 1.97 (m, 2H), 1.88 – 1.58 (m, 8H), 1.52 (m, 1H), 1.00 (d,  $J = 6.3$  Hz, 3H), 0.88 (d,

$J = 6.5$  Hz, 3H).  $^{13}\text{C}$  NMR (151 MHz,  $\text{CD}_3\text{OD}$ )  $\delta$  164.69, 154.31, 152.83, 147.92, 131.88, 129.17, 124.07, 123.41, 117.64, 61.88, 60.00, 43.60, 30.23, 30.10, 28.91, 25.85, 24.43, 24.13, 24.03, 21.81. HRMS-ESI ( $m/z$ ):  $[\text{M}+\text{H}]^+$  calcd. for  $\text{C}_{22}\text{H}_{27}\text{Cl}_2\text{N}_5\text{O}_2$ , 464.1620, found 464.1607.

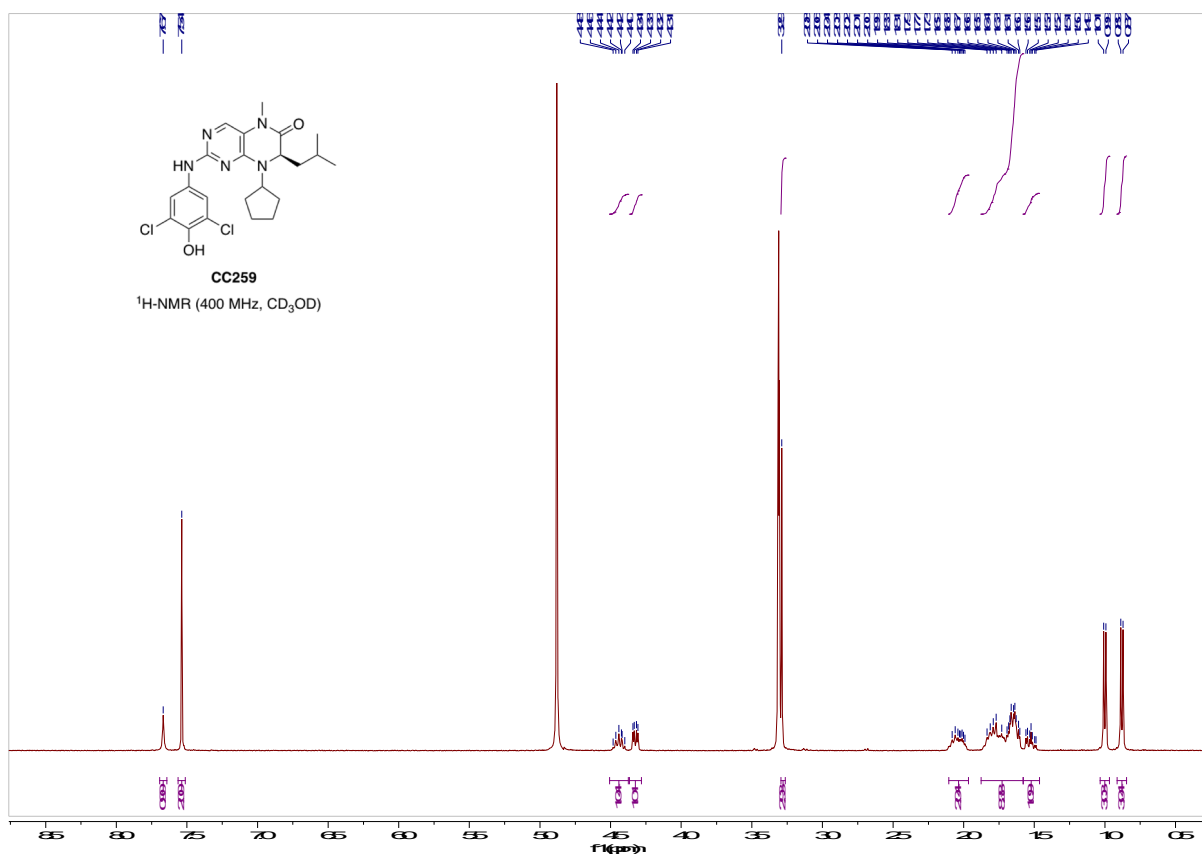

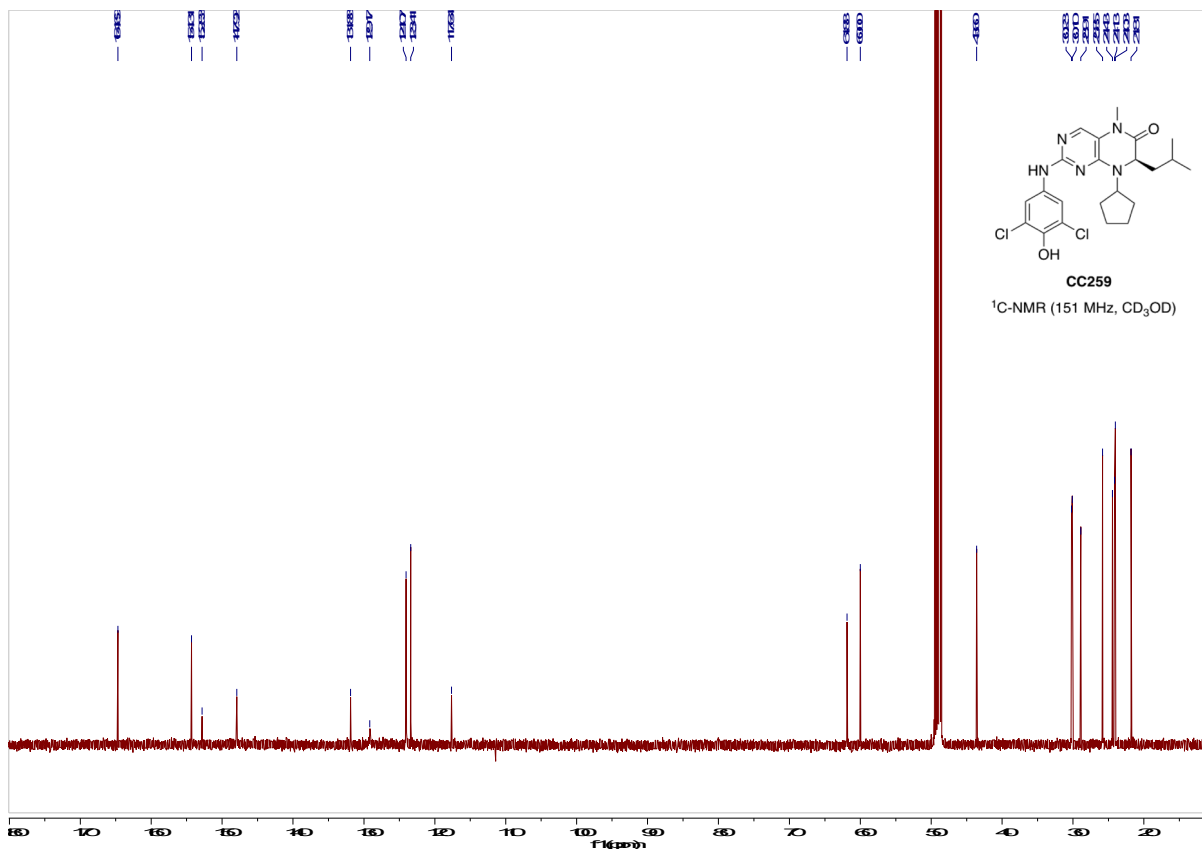

**Cell culture, siRNA knockdown and mutant expression.** BT474, MCF7, MDA-MB-157, MDA-MB-453, T47D breast cancer cells, C2C12 mouse myoblast cells, and HEK 293T cells were maintained in high-glucose DMEM medium containing 10% FBS. L6 rat myoblast cells were maintained in  $\alpha$ -MEM medium containing 10% FBS. MCF-10A p53<sup>+/+</sup> and p53<sup>-/-</sup> cells were purchased from Horizon Discovery (HD 101-005) and cultured in DMEM/F12 medium supplemented with 5% horse serum, 20ng/ml EGF, 0.5 $\mu$ g/ml hydrocortisone, 100ng/ml cholera toxin and 10 $\mu$ g/ml insulin as recommended by the company. BT549 cells were maintained in RPMI-1640 medium containing 10% FBS. UACC-812 cells were cultured in RPMI-1640 medium with 20% FBS. MDA-MB-415 cells were culture in high-glucose DMEM medium containing 10% FBS and 10 $\mu$ g/ml insulin.

For differentiation into myotubes, C2C12 cells were kept in DMEM medium containing 2% horse serum for 5 days, and L6 cells were kept in  $\alpha$ -MEM medium containing 2% FBS for 7 days. Amino-acid-free DMEM medium was prepared using powder from USBio, and MEM amino acids solution was from Gibco. Media were all supplemented with 100U/ml penicillin/streptomycin. Cell lines were purchased from ATCC.

BT474 cells were trypsinized and diluted to give 30%-50% confluence 24hrs after plating. Transfection of siRNA was achieved using Lipofectamine RNAiMAX reagent (Invitrogen) following manufacturer's protocol. A final siRNA concentration of 50nM was used in reverse transfection. The siRNAs used are summarized below:

| Oligo name  | Source        | siRNA ID or sequence   | Target              |
|-------------|---------------|------------------------|---------------------|
| siPIP4K2A/B | Sigma Aldrich | UUGAUCAUCAAUUCCAAACCUC | NM_005028/NM_003559 |
| siPIP4K2B   | Sigma Aldrich | CCCUCGAUCUAUUUCCUUCUU  | NM_003559           |
| siPIP4K2A   | Sigma Aldrich | CUGCCCGAUGGUCUCCGUAA   | NM_005028           |
| siControl   | Sigma Aldrich | SIC001                 |                     |

Lentivirus was used to generate BT474 cell lines that stably express wildtype and mutant PI5P4K $\beta$ . HEK 293T cells were used for lentiviral amplification. PI5P4K $\beta$  wildtype and double mutant (V148F/T201M) were cloned into pLVX-IRES-Puro lentiviral vector (Clontech) along with a Kozak sequence and a 3x-Flag-tag at the N-terminus using the in-fusion cloning reagents (Clontech). The expression plasmid, along with pMLV-Gag-Pol and pVSV-G plasmids, were transfected into HEK 293T cells. Viruses were collected 48hrs after transfection and filtered. BT-474 cells were infected in the presence of 8 $\mu$ g/ml polybrene (EMD Millipore), and stable lines were selected in basal media supplemented with 1 $\mu$ g/ml puromycin (Gibco). Protein expression was confirmed by western blot with anti-Flag antibody (Cell Signaling Technology).

**Immunoblot analysis.** After wash with cold DPBS buffer, cells were lysed in RIPA buffer that contains 50mM Tris-HCl pH 8.0, 150mM NaCl, 1mM EDTA, 1mM EGTA, 1% NP-40, 0.5% sodium deoxycholate, 0.1% SDS, and protease and phosphatase inhibitor cocktails (Roche). Total protein concentrations were measured using the BCA assay (Thermo scientific). Cell lysate (about 80 $\mu$ g protein) was resolved by SDS-PAGE and blotted onto PVDF membranes. The membranes were probed overnight at 4°C with appropriate primary antibodies and incubated with secondary fluorescent antibodies (LI-COR Biosciences) for 1hr at room temperature before imaging by an Odyssey CLx system. Anti-p53 primary antibody was purchased from Sigma Aldrich. Anti-PI5P4K $\gamma$  antibody was purchased from Proteintech Group. All the others, including those targeting PI5P4K $\alpha$  and PI5P4K $\beta$ , were purchased from Cell Signaling Technology.

**Adenine nucleotides measurement.** BT474 cells were plated on white solid-bottom 96-well plates in sextuplicate (corning 3917; 2x10<sup>4</sup> cells per well). C2C12 cells were plated and differentiated on the same type of plates. After treatment with compound overnight, total cellular ATP levels were measured by a luminescent ATP detection assay kit (Abcam) following manufacturer's protocol and normalized against the total protein concentration.

To measure nucleotide concentration using HPLC or LC-MS/MS, cells were rinsed three times with ice-cold DPBS buffer at room temperature and lysed in ice-cold 0.4M perchloric acid (500 $\mu$ l acid per 10<sup>6</sup> cells). The culture dishes were sealed and transferred to a -80°C freezer. Cell lysates were then thawed on ice, scraped off, and centrifuged at



14,000rpm at 4°C for 10min. The pellet was solubilized in 0.2M NaOH and set aside for measurement of protein concentration. The supernatant was transferred to clean tubes and neutralized with 3M KHCO<sub>3</sub>. The neutralized sample was kept on ice for 10min and then transferred to a -80°C freezer. After 2hrs, thawed sample was centrifuged again to remove the precipitated perchlorate, filtered, adjusted according to protein concentration, aliquoted and stored at -80°C. The sample was thawed on ice just before the HPLC or LC-MS/MS experiment. For HPLC experiments, the sample was analyzed on an Agilent 1200 HPLC system equipped with Luna C<sub>18</sub> (150mm x 4.6mm, 3μm, 100Å; Phenomenex). The flow rate was 0.7mL/min. Nucleotide separation was performed with two buffers (buffer A and B) following a literature procedure (7). The gradient was 0-5min, 100% A; 5-20min, 0-100% B; 20-25min, 100% B; 25-30min, 100% A for column re-equilibration. For LC-MS/MS experiment, sample (and AMP, ADP and ATP standards) was applied to an Agilent 1290 Infinity LC System equipped with a Hypercarb column (100mm x 4.6mm, 5μm; ThermoFisher Scientific) and coupled to an Agilent 6490 Triple Quad LC/MS. The nucleotides were separated using 20mM ammonium acetate in water (solvent A) and 5% acetonitrile in water buffered with 20mM ammonium acetate (solvent B), which were both adjusted with ammonium hydroxide to pH 9.0. The flow rate was 0.7mL/min, and the column temperature was maintained at 35°C. The gradient elution program was: 0–2min, 0-5% B; 2–12min, 5–10% B; 12–22min, 10-20% B; 22–25min, 20-100% B; 25-30min, 100% B, and then back to 100% A for 1min, which was maintained for another 9min to recondition the column. Mass spectrometric ESI ionization was performed in the negative ion mode and the source parameters were set as follows: gas temperature, 200°C; gas flow, 12L/min; nebulizer pressure, 35psi; sheath gas temperature, 200°C; sheath gas

flow, 12L/min; capillary voltage, -4,000V; fragmentor voltage, 380V. Quantification and confirmation of each compound was performed in the multiple reaction monitoring (MRM) mode (Fig. S11D).

**PI(5)P measurement.** BT-474 cells were seeded onto 10cm dishes at ~60% confluency. After incubation with 10 $\mu$ M CC260 or DMSO overnight, cells were collected, and cellular phosphoinositides were purified using NeoBeads (Echelon Biosciences; 3mg beads for each plate of cells). After neomycin affinity chromatography (8), the lipid solution was dried under nitrogen using a SpeedVac. The dried lipids were resuspended and sonicated in 100 $\mu$ l buffer containing 50mM Tris (pH 7.4) and 1mM EGTA. PI(5)P was converted to <sup>32</sup>P-labeled PI(4,5)P<sub>2</sub> in a 50 $\mu$ l reaction mixture containing 20 $\mu$ l resuspended lipids, 20mM HEPES (pH 7.3), 10mM MgCl<sub>2</sub>, 20 $\mu$ M ATP, 10 $\mu$ Ci [ $\gamma$ -<sup>32</sup>P]-ATP, and 4 $\mu$ g/ml PI5P4K $\alpha$  (I143F/T196M double mutant) for 3 hours at room temperature (9). Radiolabeled PI(4,5)P<sub>2</sub> was quantified with a phosphoimager after TLC, and the amount of PI(5)P was normalized against total protein concentration.

**ROS and cell growth rate.** 2',7'-dichlorofluorescein diacetate (DCFDA) was used to assess intracellular ROS levels. DCFDA is deacetylated in the cell and oxidized by ROS to a fluorescent product 2',7'-dichlorofluorescein (DCF). BT-474 cells were plated on a black clear-bottom 96-well plate (Corning 3603; 2x10<sup>4</sup> cells per well). ROS was measured by a DCFDA cellular ROS detection assay kit (Abcam) following the manufacturer's protocol. The cells were treated with compound for 6hrs before fluorescence was measured using a SpectraMax M5 plate reader (excitation 485nm, emission 535nm).

To measure cell number using the CellTiter-Glo 2.0 assay kit (Promega), cultured cells were equilibrated to room temperature for 30min, and an equal volume of the CellTiter-Glo reagent was added and mixed for 2min on an orbital shaker. The plates were incubated for another 10min before luminescence was recorded using a SpectraMax M5 plate reader. To assess the effect of compound on growth, cells were plated onto white solid-bottom 96-well plates (Corning 3917) in sextuplicate and treated with CC260 or DMSO for either 24hrs or 48hrs. The media were then replaced with fresh media without the compound. After 24hrs of washout, cell numbers were determined at 0, 24, 48, and 72 hrs.

**Seahorse XF real-time ATP rate Assay.** Assessment of mitochondrial and glycolytic functionality was performed by a Seahorse XF96 Analyzer (Agilent Technologies, Santa Clara, CA) using the XFp Real-Time ATP Rate Assay Kit. C2C12 myoblasts were seeded at 12,000 cells per well in the Seahorse XF microplate and differentiated for 5 days. BT-474 cells were seeded at 20,000 cells per well in complete culture medium. Cells were treated with either DMSO or 10 $\mu$ M CC260 overnight in high-glucose DMEM medium. One hour before measurement, the culture medium was replaced with the assay medium (Seahorse XF DMEM medium, pH 7.4, supplemented with 10mM glucose and 2 mM glutamine). After measuring basal respiration, 1.5  $\mu$ M oligomycin (final concentration) and 0.5 $\mu$ M rotenone/antimycin A were sequentially injected. Data were normalized to protein content in each well determined by the BCA assay and analyzed by Wave software (Agilent Technologies).

## SI Figure Legends

**Figure S1.** The hit molecules are competitive with ATP binding to PI5P4K $\alpha$ . **(A)** The Lineweaver-Burk plot of the enzyme kinetic data shown in Fig. 1B. **(B)** The concentration-inhibition curves for the hit molecules based on ADP-Glo<sup>TM</sup> assay. Experiments were performed in triplicate at a constant ATP concentration of 10 $\mu$ M. For PI5P4K $\alpha$ ,  $K_{m, ATP}$  was determined to be  $\sim$ 13 $\mu$ M based on data shown in Fig. 1B.

**Figure S2.** Crystallographic analysis reveals the structure of the specificity loop. PI5P4K $\alpha$  crystals were obtained from two conditions. In both forms, extensive electron density in the shape of an  $\alpha$ -helix was observed that corresponds to the N-terminal portion of the specificity loop. The helix has been predicted by sequence analysis (10), and by NMR study (11), but was not seen in a previously determined structure (pdb: 2YBX). **(A)** A ribbon diagram of PI5P4K $\alpha$  dimer with the protomers colored green and blue. The specificity loops are highlighted in yellow. Four sulfate ions, shown as space filling models, are found near the 2-fold symmetry axis on a flat surface facing toward the membrane, which mark possible binding sites for the acidic head groups of phospholipids. **(B)** The C $\alpha$  trace of one protomer. The difference map, contoured at 2.5 $\sigma$  and shown in green, indicates the position of the specificity loop. **(C)** Glu-150 and Glu-154 form multiple hydrogen bonds with the amino-terminal region of the specificity loop, stabilizing the sharp turn from the  $\beta$ -strand ( $\beta$ 12) to the helix. This structural feature is likely unique to PI5P4Ks since Glu-150 and Glu-154 are highly conserved only in type 2 kinases. The turn may explain PI5P4Ks' substrate specificity because it is incompatible with the binding mode of PI(4)P (1), the substrate for type 1 kinases. Although PI(4)P is much more abundant

in a cell, type 2 kinases cannot phosphorylate them. **(D)** and **(E)** The orientation of the helix, likely influenced by crystal packing, is slightly different between the two apo structures (2FoFc maps contoured at  $1\sigma$ ). It is possible that the helix may adopt yet another orientation when the protein is laterally associated with the membrane (11).

**Figure S3.** The binding mode of ATP. **(A)** 2FoFc map around the bound ATP analog and Mn(II) ions (contoured at  $1\sigma$ ). **(B)** The details of the binding interactions between AMP-PNP/Mn(II)<sub>2</sub> and PI5P4K $\alpha$ . Hydrogen bonds are shown as dashed lines. Red spheres represent water. Blue spheres represent Mn(II) ions. The structure of PI5P4K $\alpha$ :AMP-PNP complex is similar to that of zebrafish PI4P5K $\alpha$  (1), a type 1 kinase, but offers higher resolution. **(C)** and **(D)** The difference between the PI5P4K $\alpha$  structure and a published PI5P4K $\beta$ :AMP-PNP structure may be related to the fact that the latter does not contain any metal ions (pdb: 3X03) (12). Like protein kinases, divalent metal ions are required for lipid kinase activity. In PI5P4K $\alpha$ , Asp-359 from the conserved “IID” motif serves a similar function of metal binding as the aspartate from the “DFG” motif of protein kinases (1). It becomes also clear from the high-resolution structure that there is no salt bridge, or water-mediated hydrogen bonds, between Lys-145 and Asp-151, a significant difference from protein kinase, which we explored in the synthesis of lipid-kinase-specific inhibitors. In one of the AMP-PNP structures, the Gly-rich loop is partially visible. However, the loop does not appear to make extensive contacts with  $\beta$ - and  $\gamma$ -phosphates of the bound ATP analog, which is again different from its counterpart in protein kinases.

**Figure S4.** Details of the binding interactions between the hit molecules and PI5P4K $\alpha$ . Hydrogen bonds are shown as dashed lines with bond lengths indicated. Waters are shown as red spheres. In the apo structure, the backbone amide groups of Asp-359 and Ile-360 attract two water molecules, WAT1 and WAT2, which are hydrogen bonded to a chain of other well-ordered water molecules within the active site. WAT1 is displaced by a carbonyl oxygen of the bound compounds. In the complex with palbociclib, Asp-125 from the Gly-rich loop undergoes a conformational change to engage the piperazine side chain of the compound.

**Figure S5.** A PIPK-specific hydrophobic pocket. **(A)** The details of BI-2536 binding to protein kinase Plk1 (13) (pdb: 2RKU). The 6-carbonyl oxygen of the inhibitor engages in water-mediated hydrogen bonds with Lys-82, as well as backbone amide groups of Asp-194 and Phe-195. The salt bridge between Lys-82 and Glu-101 is present in all protein kinases. **(B)** Surface representation of the inhibitor binding pocket in Plk1. **(C)** Surface representation of the inhibitor binding pocket in PI5P4K $\alpha$ . The red asterisk marks the entry point to the hydrophobic pocket that is present only in this family of lipid kinases.

**Figure S6.** Chemical synthesis and characterization. **(A)** Reagents and conditions: (i) SOCl<sub>2</sub>, CH<sub>3</sub>OH, 0 °C to reflux, 2 h; (ii) cyclopentanone, CH<sub>3</sub>COONa, Na(CH<sub>3</sub>COO)<sub>3</sub>BH, CH<sub>2</sub>Cl<sub>2</sub>, 0 °C to rt; (iii) 2,4-dichloro-5-nitropyrimidine, K<sub>2</sub>CO<sub>3</sub>, acetone, 0 °C to rt, overnight; (iv) Fe powder, CH<sub>3</sub>COOH, 80 °C; (v) 1. NaH, *N,N*-dimethylacetamide, 0 °C, 20 min, 2. CH<sub>3</sub>I, 0 °C to rt; (vi) aminophenol derivatives, CH<sub>3</sub>CH<sub>2</sub>OH/H<sub>2</sub>O, conc. HCl, reflux,

overnight. **(B)**  $^{13}\text{C}$  NMR spectrum (151 MHz,  $\text{CD}_3\text{OD}$ ) of CC260. **(C)**  $^1\text{H}$  NMR spectrum (500 MHz,  $\text{CD}_3\text{OD}$ ) of CC260.

**Figure S7.** HPLC chromatograms of CC259, CC260, CC314 and CC262 on a ZORBAX SB-C18 column (2.1x50mm, 1.8mm); flow rate: 0.2mL/min; 0% to 100% of 0.1% TFA in  $\text{CH}_3\text{CN}$  over 35min; detection was performed at two UV wavelengths. The asterisks indicate the solvent front.

**Figure S8.** Determination of enantiomeric purity of CC260. In order to determine the enantiomeric purity of CC260, the enantiomer of CC260 was prepared according to Fig. S6A starting from the (*S*) enantiomer of the starting amino acid **1a**. Chiral separation of CC260 and (*S*)-CC260 was not possible with chiral HPLC chiral columns and conditions. Therefore, a derivative of CC260 with both acidic *-NH* and *-OH* methylated was prepared [see Chemical synthesis and characterization in Materials and Methods section]. The *N,O*-dimethylated derivative was also prepared for the (*S*)-CC260. Chiral HPLC analysis of the *N,O*-dimethylated derivative of CC260 using the Chiralpak AD-H established high enantiomeric purity (95% ee). **(A)** A mixture of *N,O*-dimethylated derivatives of CC260 and (*S*)-CC260 (90:10 hexanes:isopropanol, 1mL/min, 254nm). **(B)** *N,O*-Dimethylated derivative of CC260. **(C)** *N,O*-Dimethylated derivative of (*S*)-CC260.

**Figure S9.** Determining the  $K_i$ s for the newly synthesized inhibitors. **(A)** Autoradiographs of the TLC plates over a range of ATP concentrations (a duplicate is shown). Based on

the titration, the  $K_{m,ATP}$  values for PI5P4K $\alpha$  and PI5P4K $\beta$  were determined to be 13 $\mu$ M and 17 $\mu$ M, respectively. Published  $K_{m,ATP}$  values for PI5P4K $\beta$  vary widely (6 $\mu$ M (14), 67 $\mu$ M (15), 236 $\mu$ M (12)), and the reason behind the discrepancy is not clear at this time. (B) Representative autoradiographs comparing concentration effect relationship of CC260 with that of parent compound BI-D1870. In this experiment, ATP concentration was fixed at 20 $\mu$ M. (C) and (D) Concentration effect curves obtained at 20 $\mu$ M ATP. The  $K_i$  values for CC259, CC260 and CC314 against PI5P4K $\beta$  were obtained from titrations at a higher ATP concentration (60 $\mu$ M), which shifts  $IC_{50}$  to the right (insert): the concentration of PI5P4K $\beta$  in the assay mixture was about 40nM, which was not negligible at low compound concentrations. All experiments were performed in triplicate.

**Figure S10.** CC260 does not potently inhibit PI5P4K $\gamma$ . The  $\gamma$ -isoform has a very low specific activity, and high enzyme concentration (0.4 $\mu$ M) was used in all assays, which prevented us from obtaining a reliable inhibition curve at low CC260 concentrations. Nevertheless, the compound's  $K_i$  could still be calculated fairly accurately to be in the micromolar range (0.8 $\mu$ M), ~20x higher than those obtained for  $\alpha$ - and  $\beta$ -isoforms. PI5P4K $\gamma$  has a large “gate-keeper” residue (Met-203), whereas PI5P4K $\alpha$  and PI5P4K $\beta$  both have a threonine there, which may explain the large difference in potency. (A) The  $K_{m,ATP}$  for PI5P4K $\gamma$  was determined to be around 35 $\mu$ M. (B) A representative autoradiograph illustrating the extent of inhibition of PI5P4K $\gamma$  by 0.8 $\mu$ M or 4 $\mu$ M CC260. (C) A comparison of activity inhibition at those two compound concentrations among the three isoforms (all measured in triplicate). The data for PI5P4K $\alpha$  and PI5P4K $\beta$  were taken from Fig. S9C and S9D.



**Figure S11.** CC260 potently inhibits PI5P4K $\beta$ -catalyzed reaction using GTP as the phosphodonor. **(A)** and **(B)** GTP has a higher  $K_m$  (50 $\mu$ M) but greater  $V_{max}$  (2.5 times that of ATP) (12). The titration was performed in triplicate (the ATP titration curve was the same as that in Fig. S9A). **(C)** A representative autoradiograph showing the inhibition of the reaction over a range of CC260 concentrations. In this experiment, GTP concentration was fixed at 50 $\mu$ M (1x  $K_m$ ).

**Figure S12.** The crystal structure of PI5P4K $\beta$ . In the co-crystal, the inhibitor is found in only one of the two protomers in the asymmetric unit. **(A)** CC260 caused little conformational change in the kinase, except the Gly-rich loop (apo, black; complex, light orange). Superimposed  $C_\alpha$  traces are shown as a cross-eye stereogram. The inhibitor is shown as orange sticks. **(B)** Details of CC260 binding to the lipid kinase. Hydrogen bonds are shown as red dashed lines. **(C)** and **(D)** 2FoFc maps, contoured at  $1\sigma$ , reveal differences in the conformation of the G-loop between apo and complex structures. The inhibitor is colored in orange.

**Figure S13.** The selectivity profile of CC260. **(A)** Concentration inhibition curves of CC260 and its parent compounds BI-2536 and BI-D1870 for Plk1- and RSK2-mediated kinase reactions. In both titrations, the ATP concentration was fixed at 50 $\mu$ M. The assay kits for Plk1 and RSK2 were obtained from Promega (Madison, WI), which use ADP-Glo<sup>TM</sup> for activity detection. **(B)** CC260 did not inhibit PI4P5K $\alpha$  but showed modest inhibition of PIKfyve. Profiling a panel of 14 lipid kinases at Reaction Biology, which uses

ADP-Glo™ for detecting lipid kinase activities, showed that PI3K $\gamma$  and PI3K $\delta$  were also inhibited by CC260 (compound 0.5 $\mu$ M, ATP 10 $\mu$ M). The panel includes PI4P5K $\alpha$  and another type 1 kinase PI4P5K $\gamma$ , neither of which was inhibited (PI4P5K $\alpha$  95% activity remaining; PI4P5K $\gamma$  98%). **(C)** CC260 was tested against 396 human protein kinases at Reaction Biology Corporation (Malvern, PA) at a single compound concentration of 0.5 $\mu$ M and an ATP concentration of 20 $\mu$ M using the HotSpot<sup>SM</sup> radioisotope filter binding assay. Plk1 and RSK2 are among the kinases examined, and their extent of inhibition (Plk1 activity remaining 97%; RSK2, 83%) is consistent with the results shown in (A) that cover a range of compound concentrations: calculated RSK2 activity at 0.5 $\mu$ M CC260 and 20 $\mu$ M ATP is 79% of that of DMSO control. **(D)** The degree of kinase inhibition at various compound concentrations used in the cell culture experiment assuming an intracellular ATP concentration of 2mM. The  $K_{m,ATP}$  value for PIKfyve was based on literature (16).

**Figure S14.** Measuring intracellular adenine nucleotide concentrations. **(A)** HPLC elution profiles of acid extracts of C2C12 myotubes treated with DMSO or 10 $\mu$ M CC260. **(B)** Quantification of the areas under the ATP peak (measured in triplicate). **(C)** An equimolar mixture of AMP, ADP and ATP standards resolved by LC-MS/MS. **(D)** The fragmentation of AMP or ADP generated PO<sub>3</sub> (theoretical M.W. 79.0 Da), and the fragmentation of ATP yielded a P<sub>2</sub>O<sub>6</sub> ion (theoretical M.W. 157.9 Da).

**Figure S15.** CC260 caused **(A)** AMPK activation (increase of raptor phosphorylation), mTORC1 inhibition (decrease of 4E-BP1 phosphorylation), and **(B)** a small increase of cellular PI(5)P level. BT474 cells were treated with compound overnight in DMEM

medium without serum (n=3). Results are shown as means  $\pm$  SEM. \* indicates  $p \leq 0.01$  and \*\*\* indicates  $p \leq 0.0001$  based on Student's *t*-test.

**Figure S16.** Overexpression of PI5P4K $\alpha$  causes AMPK activation. (A) Comparing the *in vitro* activities of PI5P4K $\alpha$  wildtype (WT) and double mutant (DM) at different inhibitor concentrations (n=3). Ile-143 and Thr-196 are equivalent to Val-148 and Thr-201 in PI5P4K $\beta$ . (B) and (C) Overexpression of PI5P4K $\alpha$  WT or DM increased ACC phosphorylation. \* marks the endogenous lipid kinase (the overexpressed lipid kinases have higher molecular weights due to an N-terminal 3x FLAG tag and linker). In (B), cells were treated with compound (0, 5 and 10 $\mu$ M) overnight in serum-free DMEM medium.

**Figure S17.** CC260 caused AMPK activation in a panel of breast cancer cells with different p53 status (wildtype, null, missense mutation). (A) Cells were treated with 10 $\mu$ M compound overnight in serum-free media before western blot analysis (n=3). BT474 cells harbor a temperature sensitive mutant p53 that regains wildtype function at 32°C (17). (B) The relative phosphor-ACC levels are shown as means  $\pm$  SEM. \*\* indicates  $p \leq 0.001$  and \*\*\* indicates  $p \leq 0.0001$  based on Student's *t*-test.

**Figure S18.** PI5P4K $\alpha/\beta$  inhibition reduces BT474 cell survival. (A) BT474 cells were treated with 10 $\mu$ M CC260 or DMSO in serum-free low-glucose DMEM medium for 18h before being plated (2,000 cells per well) to grow into colonies. The absence of serum during treatment did not significantly reduce the number of colonies (<10%). BT474 cells are not as sensitive to CC260 as MCF-10A cells. (B) Heterologous expression of CC260-

refractory PI5P4K $\beta$  mutant, instead of wildtype, rescued cell survival upon compound treatment. The number of colonies were determined by *ImageJ* (n=3). Results are shown as means  $\pm$  SEM. # indicates  $p \leq 0.05$  based on Student's *t*-test.

**Figure S19.** After overnight CC260 (10 $\mu$ M) treatment or glucose-starvation in serum-free DMEM/F12 medium supplemented with 0.5 $\mu$ g/ml hydrocortisone, 100ng/ml cholera toxin and 10 $\mu$ g/ml insulin, cell death was estimated by LDH activity present in the supernatant (n=3). Results are shown as means  $\pm$  SEM. \*\*\* indicates  $p \leq 0.0001$  based on Student's *t*-test. N.S., non-statistically significant.

**Figure S20.** PI5P4K $\alpha/\beta$  inhibition causes oxidative stress in BT474 cells (18). **(A)** CC260 treatment increased ROS and p38 phosphorylation. DCF, dichlorofluorescein; NAC, N-acetyl cysteine. Results are shown as means  $\pm$  SEM (n=10). \*\*\* indicates  $p \leq 0.0001$  based on Student's *t*-test. **(B)** The effect of oxidative stress on cell proliferation is time dependent. After a short-term (24 hrs) treatment with CC260 (followed by a 24-hour washout period), the cells resumed growth at a similar rate as untreated cells. Only prolonged treatment produced a lasting effect of cell proliferation. RLU, relative luminescence unit.

**Figure S21.** Oxygen consumption and medium acidification profiles for **(A)** C2C12 myotubes and **(B)** BT474 cells. OCR, oxygen consumption rate; ECAR, extracellular

acidification rate; Rot, rotenone; AA, antimycin A. Data are presented as means  $\pm$  SEM of 16 wells.

## SI References

1. Muftuoglu Y, Xue Y, Gao X, Wu D, & Ha Y (2016) Mechanism of substrate specificity of phosphatidylinositol phosphate kinases. *Proc Natl Acad Sci U S A* 113(31):8711-8716.
2. Otwinowski Z & Minor W (1997) Processing of X-ray diffraction data collected in oscillation mode. *Methods in enzymology* 276:307-326.
3. Winn MD, *et al.* (2011) Overview of the CCP4 suite and current developments. *Acta crystallographica. Section D, Biological crystallography* 67(Pt 4):235-242.
4. Emsley P, Lohkamp B, Scott WG, & Cowtan K (2010) Features and development of Coot. *Acta crystallographica. Section D, Biological crystallography* 66(Pt 4):486-501.
5. Schuttelkopf AW & van Aalten DM (2004) PRODRG: a tool for high-throughput crystallography of protein-ligand complexes. *Acta crystallographica. Section D, Biological crystallography* 60(Pt 8):1355-1363.
6. Rao VD, Misra S, Boronenkov IV, Anderson RA, & Hurley JH (1998) Structure of type II beta phosphatidylinositol phosphate kinase: a protein kinase fold flattened for interfacial phosphorylation. *Cell* 94(6):829-839.
7. Manfredi G, Yang L, Gajewski CD, & Mattiazzi M (2002) Measurements of ATP in mammalian cells. *Methods (San Diego, Calif.)* 26(4):317-326.
8. Schacht J (1978) Purification of polyphosphoinositides by chromatography on immobilized neomycin. *Journal of lipid research* 19(8):1063-1067.
9. Morris JB, Hinchliffe KA, Ciruela A, Letcher AJ, & Irvine RF (2000) Thrombin stimulation of platelets causes an increase in phosphatidylinositol 5-phosphate revealed by mass assay. *FEBS letters* 475(1):57-60.
10. Kunz J, Fuelling A, Kolbe L, & Anderson RA (2002) Stereo-specific substrate recognition by phosphatidylinositol phosphate kinases is swapped by changing a single amino acid residue. *J Biol Chem* 277(7):5611-5619.
11. Liu A, Sui D, Wu D, & Hu J (2016) The activation loop of PIP5K functions as a membrane sensor essential for lipid substrate processing. *Science advances* 2(11):e1600925.
12. Sumita K, *et al.* (2016) The Lipid Kinase PI5P4K beta Is an Intracellular GTP Sensor for Metabolism and Tumorigenesis. *Molecular cell* 61(2):187-198.
13. Kothe M, *et al.* (2007) Selectivity-determining residues in Plk1. *Chemical biology & drug design* 70(6):540-546.
14. Demian DJ, *et al.* (2009) High-throughput, cell-free, liposome-based approach for assessing in vitro activity of lipid kinases. *Journal of biomolecular screening* 14(7):838-844.
15. Clarke JH & Irvine RF (2013) Evolutionarily conserved structural changes in phosphatidylinositol 5-phosphate 4-kinase (PI5P4K) isoforms are responsible for differences in enzyme activity and localization. *The Biochemical journal* 454(1):49-57.
16. Fogarty K, *et al.* (2017) Development of Three Orthogonal Assays Suitable for the Identification and Qualification of PIKfyve Inhibitors. *Assay and drug development technologies* 15(5):210-219.
17. Dearth LR, *et al.* (2007) Inactive full-length p53 mutants lacking dominant wild-type p53 inhibition highlight loss of heterozygosity as an important aspect of p53 status in human cancers. *Carcinogenesis* 28(2):289-298.
18. Emerling BM, *et al.* (2013) Depletion of a putatively druggable class of phosphatidylinositol kinases inhibits growth of p53-null tumors. *Cell* 155(4):844-857.

**Table S1.** Crystallographic statistics for apo and AMP-PNP bound PI5P4K $\alpha$  (space group: P6<sub>1</sub>22).

| Data Collection                                   | Apo                   | <sup>d</sup> Apo (2)  | AMP-PNP               | <sup>d</sup> AMP-PNP (2) |
|---------------------------------------------------|-----------------------|-----------------------|-----------------------|--------------------------|
| Wavelength (Å)                                    | 1.075                 | 1.075                 | 1.075                 | 1.075                    |
| Unit cell (a, c; Å)                               | 135.7, 95.1           | 135.7, 94.3           | 136.1, 95.1           | 135.9, 94.9              |
| <sup>a</sup> Resolution (Å)                       | 40-2.2<br>(2.28-2.20) | 40-2.5<br>(2.59-2.50) | 40-2.1<br>(2.18-2.10) | 40-2.0<br>(2.07-2.00)    |
| Redundancy                                        | 14.2                  | 18.6                  | 13.6                  | 37.1                     |
| Completeness (%)                                  | 97.8                  | 100.0                 | 99.7                  | 97.7                     |
| <I/σ>                                             | 10.8                  | 18.4                  | 11.0                  | 10.3                     |
| <sup>a,b</sup> R <sub>merge</sub>                 | 0.093 (0.870)         | 0.087 (0.766)         | 0.074 (0.711)         | 0.091 (0.726)            |
| <b>Refinement</b>                                 |                       |                       |                       |                          |
| Unique reflections                                | 24,766                | 17,349                | 29,179                | 32,904                   |
| Number of atoms                                   |                       |                       |                       |                          |
| Protein                                           | 2,440                 | 2,466                 | 2,468                 | 2,429                    |
| Ligand                                            | -                     | -                     | 33                    | 33                       |
| Solvent                                           | 168                   | 135                   | 197                   | 205                      |
| <sup>c</sup> R <sub>work</sub> /R <sub>free</sub> | 0.208/0.245           | 0.197/0.233           | 0.213/0.251           | 0.213/0.251              |
| B-factor (Å <sup>2</sup> )                        | 54                    | 64                    | 49                    | 52                       |
| r.m.s. deviations                                 |                       |                       |                       |                          |
| Bond lengths (Å)                                  | 0.010                 | 0.007                 | 0.009                 | 0.008                    |
| Bond angles (°)                                   | 1.225                 | 1.065                 | 1.196                 | 1.165                    |
| PDB accession code                                | 7N6Z                  | 7N71                  | 7N7J                  | 7N7K                     |

<sup>a</sup>Highest resolution shell is shown in parentheses.

$$^b R_{\text{merge}} = \frac{\sum |I_i - \langle I \rangle|}{\sum I_i}$$

<sup>c</sup>R<sub>work</sub> =  $\frac{\sum |F_o - F_c|}{\sum F_o}$ . R<sub>free</sub> is the cross-validation R factor for the test set of reflections (5% of the total) omitted in model refinement.

<sup>d</sup>This crystal form, although in the same space group, was obtained from a different crystallization condition.

**Table S2.** Crystallographic statistics for PI5P4K $\alpha$  inhibitor complexes (space group: P6<sub>1</sub>22).

| Data Collection                                   | BI-D1870              | BI-2536               | Volasertib            | Palbociclib           |
|---------------------------------------------------|-----------------------|-----------------------|-----------------------|-----------------------|
| Wavelength (Å)                                    | 1.181                 | 0.979                 | 0.979                 | 0.979                 |
| Unit cell (a, c; Å)                               | 136.3, 95.4           | 136.4, 95.0           | 136.1, 95.2           | 135.9, 95.0           |
| <sup>a</sup> Resolution (Å)                       | 40-2.7<br>(2.80-2.70) | 40-2.6<br>(2.69-2.60) | 40-2.3<br>(2.38-2.30) | 40-2.7<br>(2.80-2.70) |
| Redundancy                                        | 14.2                  | 9.6                   | 14.2                  | 14.4                  |
| Completeness (%)                                  | 100.0                 | 97.5                  | 100.0                 | 100.0                 |
| <I/σ>                                             | 10.3                  | 12.0                  | 13.6                  | 10.5                  |
| <sup>a,b</sup> R <sub>merge</sub>                 | 0.149 (0.713)         | 0.082 (0.827)         | 0.077 (0.577)         | 0.074 (0.842)         |
| <b>Refinement</b>                                 |                       |                       |                       |                       |
| Unique reflections                                | 14,142                | 15,422                | 22,411                | 14,011                |
| Number of atoms                                   |                       |                       |                       |                       |
| Protein                                           | 2,366                 | 2,367                 | 2,379                 | 2,377                 |
| Ligand                                            | 28                    | 38                    | 45                    | 33                    |
| Solvent                                           | 115                   | 81                    | 135                   | 81                    |
| <sup>c</sup> R <sub>work</sub> /R <sub>free</sub> | 0.193/0.242           | 0.195/0.236           | 0.214/0.258           | 0.197/0.253           |
| B-factor (Å <sup>2</sup> )                        | 61                    | 70                    | 61                    | 72                    |
| r.m.s. deviations                                 |                       |                       |                       |                       |
| Bond lengths (Å)                                  | 0.008                 | 0.008                 | 0.007                 | 0.008                 |
| Bond angles (°)                                   | 1.256                 | 1.228                 | 1.088                 | 1.243                 |
| PDB accession code                                | 7N7L                  | 7N7M                  | 7N7N                  | 7N7O                  |

<sup>a</sup>Highest resolution shell is shown in parentheses.

$$^b R_{\text{merge}} = \frac{\sum |I_i - \langle I \rangle|}{\sum I_i}$$

<sup>c</sup>R<sub>work</sub> =  $\frac{\sum |F_o - F_c|}{\sum F_o}$ . R<sub>free</sub> is the cross-validation R factor for the test set of reflections (5% of the total) omitted in model refinement.



**Table S3.** Crystallographic statistics for PI5P4K $\beta$  (space group: P2<sub>1</sub>).

| Data Collection                                   | Apo                                           | CC260                                         |
|---------------------------------------------------|-----------------------------------------------|-----------------------------------------------|
| Wavelength (Å)                                    | 0.979                                         | 0.979                                         |
| Cell Dimensions (Å)                               | a=71.7, b=51.2, c=107.1<br>$\beta=94.6^\circ$ | a=73.5, b=51.7, c=107.6<br>$\beta=95.4^\circ$ |
| <sup>a</sup> Resolution (Å)                       | 40-2.5 (2.59-2.50)                            | 40-2.7 (2.80-2.70)                            |
| Redundancy                                        | 2.6                                           | 3.9                                           |
| Completeness (%)                                  | 89.0                                          | 98.8                                          |
| $\langle I/\sigma \rangle$                        | 4.6                                           | 7.0                                           |
| <sup>a,b</sup> R <sub>merge</sub>                 | 0.129 (0.660)                                 | 0.122 (0.968)                                 |
| Refinement                                        |                                               |                                               |
| Unique reflections                                | 23,433                                        | 21,128                                        |
| Number of Atoms                                   |                                               |                                               |
| Protein                                           | 4,588                                         | 4,708                                         |
| Ligand                                            | -                                             | 33                                            |
| Solvent                                           | 115                                           | 138                                           |
| <sup>c</sup> R <sub>work</sub> /R <sub>free</sub> | 0.201/0.283                                   | 0.187/0.280                                   |
| B-factor (Å <sup>2</sup> )                        | 61                                            | 71                                            |
| r.m.s. deviations                                 |                                               |                                               |
| Bond lengths (Å)                                  | 0.012                                         | 0.012                                         |
| Bond angles (°)                                   | 1.645                                         | 1.631                                         |
| PDB accession code                                | 7N80                                          | 7N81                                          |

<sup>a</sup>Highest resolution shell is shown in parentheses.

$$^b R_{\text{merge}} = \frac{\sum |I_i - \langle I \rangle|}{\sum I_i}$$

<sup>c</sup>R<sub>work</sub> =  $\frac{\sum |F_o - F_c|}{\sum F_o}$ . R<sub>free</sub> is the cross-validation R factor for the test set of reflections (5% of the total) omitted in model refinement.

**Table S4.**

**396 protein kinase panel**

CC260 was tested in single dose duplicate mode at a concentration of 0.5µM.

Reactions were carried out at 20µM ATP.

| Kinase:     | % Enzyme Activity (relative to DMSO controls)<br>CC260 |        | Average remaining activity % |
|-------------|--------------------------------------------------------|--------|------------------------------|
|             | Data 1                                                 | Data 2 |                              |
|             | ABL1                                                   | 92.28  |                              |
| ABL2/ARG    | 99.99                                                  | 96.86  | 98.43                        |
| ACK1        | 86.66                                                  | 85.64  | 86.15                        |
| AKT1        | 98.84                                                  | 97.18  | 98.01                        |
| AKT2        | 90.22                                                  | 89.64  | 89.93                        |
| AKT3        | 82.15                                                  | 81.39  | 81.77                        |
| ALK         | 105.14                                                 | 100.99 | 103.06                       |
| ALK1/ACVRL1 | 123.39                                                 | 117.89 | 120.64                       |
| ALK2/ACVR1  | 84.93                                                  | 84.51  | 84.72                        |
| ALK3/BMPR1A | 108.38                                                 | 102.93 | 105.66                       |
| ALK4/ACVR1B | 110.95                                                 | 110.32 | 110.64                       |
| ALK5/TGFBR1 | 95.49                                                  | 93.69  | 94.59                        |
| ALK6/BMPR1B | 98.04                                                  | 91.86  | 94.95                        |
| ARAF        | 101.50                                                 | 100.89 | 101.19                       |
| ARK5/NUAK1  | 93.94                                                  | 92.80  | 93.37                        |
| ASK1/MAP3K5 | 95.83                                                  | 94.74  | 95.28                        |
| Aurora A    | 96.22                                                  | 92.20  | 94.21                        |
| Aurora B    | 89.49                                                  | 89.14  | 89.32                        |
| Aurora C    | 103.21                                                 | 99.47  | 101.34                       |
| AXL         | 91.32                                                  | 90.80  | 91.06                        |
| BLK         | 100.64                                                 | 100.52 | 100.58                       |
| BMPR2       | 105.14                                                 | 105.13 | 105.14                       |
| BMX/ETK     | 101.29                                                 | 99.92  | 100.60                       |
| BRAF        | 107.79                                                 | 106.20 | 107.00                       |
| BRK         | 96.97                                                  | 95.15  | 96.06                        |
| BRSK1       | 93.45                                                  | 91.88  | 92.67                        |
| BRSK2       | 92.24                                                  | 91.45  | 91.84                        |
| BTK         | 90.71                                                  | 88.93  | 89.82                        |
| c-Kit       | 105.12                                                 | 104.63 | 104.87                       |
| c-MER       | 68.84                                                  | 65.95  | 67.40                        |
| c-MET       | 99.77                                                  | 96.30  | 98.03                        |
| c-Src       | 95.67                                                  | 95.12  | 95.40                        |
| CAMK1a      | 97.18                                                  | 95.72  | 96.45                        |
| CAMK1b      | 86.06                                                  | 81.74  | 83.90                        |
| CAMK1d      | 93.71                                                  | 91.08  | 92.39                        |
| CAMK1g      | 93.55                                                  | 93.42  | 93.48                        |
| CAMK2a      | 116.44                                                 | 108.25 | 112.35                       |
| CAMK2b      | 95.55                                                  | 95.11  | 95.33                        |
| CAMK2d      | 108.14                                                 | 106.50 | 107.32                       |
| CAMK2g      | 94.20                                                  | 92.44  | 93.32                        |
| CAMK4       | 99.57                                                  | 98.26  | 98.92                        |
| CAMKK1      | 93.43                                                  | 89.74  | 91.59                        |
| CAMKK2      | 83.33                                                  | 82.74  | 83.04                        |

**17 lipid kinase panel**

CC260 was tested in single dose duplicate mode at 0.5µM.

Reactions were carried out at 10µM ATP.

| Kinase:                   | Substrate:           | % Enzyme Activity (relative to DMSO controls)<br>CC260 |                      | Average remaining activity % |
|---------------------------|----------------------|--------------------------------------------------------|----------------------|------------------------------|
|                           |                      | Data 1                                                 | Data 2               |                              |
|                           |                      | PI3KC2A                                                | Phosphatidylinositol |                              |
| PI3KC3                    | PI:PS                | 101.42                                                 | 100.84               | 101.13                       |
| PI4Ka                     | Phosphatidylinositol | 110.06                                                 | 111.42               | 110.74                       |
| PI4Kb                     | Phosphatidylinositol | 88.83                                                  | 88.54                | 88.69                        |
| PI4K2A                    | Phosphatidylinositol | 93.00                                                  | 94.59                | 93.80                        |
| PIP5K1A                   | PI(4)P:PS            | 95.61                                                  | 95.27                | 95.44                        |
| PIP5K1C                   | PI(4)P:PS            | 97.83                                                  | 97.99                | 97.91                        |
| SPHK1                     | Sphingosine          | 96.86                                                  | 95.83                | 96.35                        |
| SPHK2                     | Sphingosine          | 111.21                                                 | 110.51               | 110.86                       |
| PI3Ka (p110a/p85a)        | PI(4,5)P2:PS         | 94.36                                                  | 93.70                | 94.03                        |
| PI3Kb (p110b/p85a)        | PI(4,5)P2:PS         | 118.22                                                 | 117.07               | 117.65                       |
| PI3Kg (p110g)             | PI(4,5)P2:PS         | 57.77                                                  | 55.89                | 56.83                        |
| PI3Kd (p110d/p85a)        | PI(4,5)P2:PS         | 20.81                                                  | 19.36                | 20.08                        |
| PI3K (p110a/p65a)         | PI(4,5)P2:PS         | 106.44                                                 | 106.53               | 106.49                       |
| PI3K (p110a(E542K)/p85a)  | PI(4,5)P2:PS         | 107.17                                                 | 107.12               | 107.15                       |
| PI3K (p110a(E545K)/p85a)  | PI(4,5)P2:PS         | 107.58                                                 | 107.41               | 107.49                       |
| PI3K (p110a(H1047R)/p85a) | PI(4,5)P2:PS         | 98.47                                                  | 100.80               | 99.64                        |

|                          |        |        |        |
|--------------------------|--------|--------|--------|
| CDC7/DBF4                | 97.83  | 93.73  | 95.78  |
| CDK1/cyclin A            | 99.56  | 99.46  | 99.51  |
| CDK1/cyclin B            | 105.10 | 104.19 | 104.64 |
| CDK1/cyclin E            | 99.37  | 99.12  | 99.25  |
| CDK14/cyclin Y (PFTK1)   | 100.95 | 100.56 | 100.76 |
| CDK16/cyclin Y (PCTAIRE) | 104.02 | 103.33 | 103.68 |
| CDK17/cyclin Y (PCTK2)   | 98.29  | 97.97  | 98.13  |
| CDK18/cyclin Y (PCTK3)   | 92.53  | 87.80  | 90.16  |
| CDK19/cyclin C           | 95.23  | 93.14  | 94.18  |
| CDK2/cyclin A            | 94.93  | 93.78  | 94.35  |
| CDK2/Cyclin A1           | 104.15 | 102.73 | 103.44 |
| CDK2/cyclin E            | 99.03  | 97.49  | 98.26  |
| CDK2/cyclin E2           | 98.87  | 98.16  | 98.51  |
| CDK2/cyclin O            | 105.79 | 105.45 | 105.62 |
| CDK20/cyclin H           | 101.58 | 100.65 | 101.11 |
| CDK20/cyclin T1          | 98.65  | 96.65  | 97.65  |
| CDK3/cyclin E            | 97.43  | 95.53  | 96.48  |
| CDK3/cyclin E2           | 88.07  | 87.93  | 88.00  |
| CDK4/cyclin D1           | 101.94 | 98.02  | 99.98  |
| CDK4/cyclin D3           | 106.03 | 104.74 | 105.38 |
| CDK5/p25                 | 107.16 | 104.83 | 106.00 |
| CDK5/p35                 | 98.99  | 96.57  | 97.78  |
| CDK6/cyclin D1           | 100.54 | 99.28  | 99.91  |
| CDK6/cyclin D3           | 102.30 | 101.27 | 101.79 |
| CDK7/cyclin H            | 99.89  | 99.25  | 99.57  |
| CDK8/cyclin C            | 96.29  | 96.13  | 96.21  |
| CDK9/cyclin K            | 102.73 | 98.06  | 100.39 |
| CDK9/cyclin T1           | 95.16  | 94.87  | 95.01  |
| CDK9/cyclin T2           | 105.86 | 101.78 | 103.82 |
| CHK1                     | 106.55 | 101.16 | 103.85 |
| CHK2                     | 100.19 | 99.56  | 99.87  |
| CK1a1                    | 95.08  | 91.91  | 93.50  |
| CK1a1L                   | 105.32 | 104.61 | 104.96 |
| CK1d                     | 111.46 | 103.65 | 107.56 |
| CK1epsilon               | 97.80  | 96.57  | 97.19  |
| CK1g1                    | 94.54  | 94.47  | 94.50  |
| CK1g2                    | 96.08  | 95.43  | 95.76  |
| CK1g3                    | 109.12 | 106.46 | 107.79 |
| CK2a                     | 104.25 | 103.00 | 103.62 |
| CK2a2                    | 89.36  | 88.21  | 88.78  |
| CLK1                     | 80.95  | 80.30  | 80.62  |
| CLK2                     | 119.29 | 115.41 | 117.35 |
| CLK3                     | 101.41 | 94.01  | 97.71  |
| CLK4                     | 92.15  | 87.02  | 89.59  |
| COT1/MAP3K8              | 91.95  | 90.57  | 91.26  |
| CSK                      | 98.60  | 98.08  | 98.34  |
| CTK/MATK                 | 108.66 | 106.87 | 107.76 |
| DAPK1                    | 79.00  | 77.65  | 78.33  |
| DAPK2                    | 106.10 | 103.19 | 104.65 |
| DCAMKL1                  | 114.97 | 110.00 | 112.49 |
| DCAMKL2                  | 97.04  | 95.96  | 96.50  |
| DDR1                     | 101.68 | 101.29 | 101.49 |
| DDR2                     | 112.44 | 108.77 | 110.60 |

|              |        |        |        |
|--------------|--------|--------|--------|
| DLK/MAP3K12  | 110.56 | 107.05 | 108.80 |
| DMPK         | 105.49 | 105.26 | 105.38 |
| DMPK2        | 103.65 | 102.14 | 102.90 |
| DRAK1/STK17A | 103.88 | 103.73 | 103.80 |
| DYRK1/DYRK1A | 95.00  | 94.68  | 94.84  |
| DYRK1B       | 96.77  | 95.84  | 96.30  |
| DYRK2        | 100.92 | 98.45  | 99.69  |
| DYRK3        | 111.12 | 110.13 | 110.63 |
| DYRK4        | 103.07 | 99.66  | 101.36 |
| EGFR         | 89.30  | 88.93  | 89.12  |
| EPHA1        | 93.24  | 93.09  | 93.16  |
| EPHA2        | 94.36  | 92.84  | 93.60  |
| EPHA3        | 87.41  | 84.29  | 85.85  |
| EPHA4        | 93.53  | 90.69  | 92.11  |
| EPHA5        | 101.30 | 100.90 | 101.10 |
| EPHA6        | 105.63 | 100.24 | 102.93 |
| EPHA7        | 92.33  | 91.12  | 91.73  |
| EPHA8        | 100.06 | 100.05 | 100.05 |
| EPHB1        | 91.31  | 90.62  | 90.97  |
| EPHB2        | 96.19  | 95.00  | 95.59  |
| EPHB3        | 102.15 | 101.09 | 101.62 |
| EPHB4        | 106.70 | 106.12 | 106.41 |
| ERBB2/HER2   | 107.34 | 107.02 | 107.18 |
| ERBB4/HER4   | 87.52  | 86.40  | 86.96  |
| ERK1         | 111.75 | 109.11 | 110.43 |
| ERK2/MAPK1   | 108.84 | 100.47 | 104.65 |
| ERK5/MAPK7   | 92.77  | 92.29  | 92.53  |
| ERK7/MAPK15  | 108.37 | 107.38 | 107.87 |
| ERN1/IRE1    | 94.97  | 92.50  | 93.73  |
| ERN2/IRE2    | 102.91 | 96.46  | 99.68  |
| FAK/PTK2     | 97.23  | 96.30  | 96.76  |
| FER          | 91.72  | 86.81  | 89.26  |
| FES/FPS      | 104.43 | 103.51 | 103.97 |
| FGFR1        | 97.87  | 96.77  | 97.32  |
| FGFR2        | 117.13 | 113.29 | 115.21 |
| FGFR3        | 100.51 | 99.37  | 99.94  |
| FGFR4        | 100.71 | 100.49 | 100.60 |
| FGR          | 81.97  | 81.03  | 81.50  |
| FLT1/VEGFR1  | 101.59 | 99.18  | 100.39 |
| FLT3         | 85.14  | 84.70  | 84.92  |
| FLT4/VEGFR3  | 134.23 | 128.42 | 131.32 |
| FMS          | 96.77  | 96.53  | 96.65  |
| FRK/PTK5     | 97.32  | 96.72  | 97.02  |
| FYN          | 107.51 | 106.39 | 106.95 |
| GCK/MAP4K2   | 88.80  | 88.77  | 88.79  |
| GLK/MAP4K3   | 104.37 | 103.78 | 104.08 |
| GRK1         | 121.06 | 114.37 | 117.72 |
| GRK2         | 97.34  | 96.89  | 97.11  |
| GRK3         | 110.15 | 107.46 | 108.81 |
| GRK4         | 100.77 | 100.45 | 100.61 |
| GRK5         | 92.54  | 92.39  | 92.47  |
| GRK6         | 106.88 | 106.45 | 106.66 |
| GRK7         | 108.71 | 102.97 | 105.84 |

|               |        |        |        |
|---------------|--------|--------|--------|
| GSK3a         | 97.71  | 94.60  | 96.15  |
| GSK3b         | 113.41 | 111.80 | 112.60 |
| Haspin        | 103.12 | 102.12 | 102.62 |
| HCK           | 92.86  | 89.92  | 91.39  |
| HGK/MAP4K4    | 89.92  | 87.07  | 88.50  |
| HIPK1         | 121.67 | 119.30 | 120.48 |
| HIPK2         | 93.29  | 91.95  | 92.62  |
| HIPK3         | 99.41  | 94.72  | 97.07  |
| HIPK4         | 109.73 | 108.97 | 109.35 |
| HPK1/MAP4K1   | 130.23 | 128.46 | 129.34 |
| IGF1R         | 101.29 | 98.80  | 100.04 |
| IKKa/CHUK     | 93.43  | 87.95  | 90.69  |
| IKKb/IKKB     | 108.24 | 104.26 | 106.25 |
| IKKe/IKBKE    | 106.72 | 103.00 | 104.86 |
| IR            | 106.40 | 104.48 | 105.44 |
| IRAK1         | 98.28  | 95.72  | 97.00  |
| IRAK4         | 113.26 | 110.86 | 112.06 |
| IRR/INSRR     | 84.80  | 83.69  | 84.25  |
| ITK           | 82.36  | 80.37  | 81.37  |
| JAK1          | 112.51 | 110.47 | 111.49 |
| JAK2          | 100.58 | 100.20 | 100.39 |
| JAK3          | 106.88 | 104.87 | 105.87 |
| JNK1          | 97.16  | 97.02  | 97.09  |
| JNK2          | 108.23 | 105.70 | 106.97 |
| JNK3          | 90.45  | 89.61  | 90.03  |
| KDR/VEGFR2    | 84.43  | 83.47  | 83.95  |
| KHS/MAP4K5    | 83.29  | 82.55  | 82.92  |
| KSR1          | 121.03 | 116.95 | 118.99 |
| KSR2          | 100.61 | 99.97  | 100.29 |
| LATS1         | 98.31  | 97.53  | 97.92  |
| LATS2         | 96.25  | 95.37  | 95.81  |
| LCK           | 95.14  | 94.62  | 94.88  |
| LCK2/ICK      | 119.72 | 107.77 | 113.74 |
| LIMK1         | 89.80  | 88.37  | 89.08  |
| LIMK2         | 137.87 | 136.34 | 137.10 |
| LKB1          | 96.63  | 95.81  | 96.22  |
| LOK/STK10     | 108.92 | 107.06 | 107.99 |
| LRRK2         | 94.02  | 93.45  | 93.74  |
| LYN           | 112.28 | 111.61 | 111.95 |
| LYN B         | 105.25 | 104.46 | 104.85 |
| MAK           | 96.14  | 95.72  | 95.93  |
| MAPKAPK2      | 94.09  | 92.26  | 93.18  |
| MAPKAPK3      | 94.79  | 92.43  | 93.61  |
| MAPKAPK5/PRAK | 105.29 | 100.01 | 102.65 |
| MARK1         | 95.20  | 92.40  | 93.80  |
| MARK2/PAR-1Ba | 95.00  | 92.20  | 93.60  |
| MARK3         | 92.64  | 89.91  | 91.27  |
| MARK4         | 104.70 | 103.88 | 104.29 |
| MASTL         | 94.27  | 94.08  | 94.18  |
| MEK1          | 106.40 | 102.35 | 104.37 |
| MEK2          | 95.62  | 94.74  | 95.18  |
| MEK3          | 104.40 | 101.01 | 102.71 |
| MEK5          | 106.93 | 105.93 | 106.43 |

|                 |        |        |        |
|-----------------|--------|--------|--------|
| MEKK1           | 116.82 | 110.21 | 113.52 |
| MEKK2           | 119.74 | 118.60 | 119.17 |
| MEKK3           | 106.07 | 99.78  | 102.92 |
| MEKK6           | 110.98 | 107.39 | 109.19 |
| MELK            | 97.09  | 95.96  | 96.53  |
| MINK/MINK1      | 104.54 | 103.09 | 103.82 |
| MKK4            | 103.01 | 98.68  | 100.85 |
| MKK6            | 98.85  | 97.42  | 98.14  |
| MKK7            | 103.64 | 103.47 | 103.55 |
| MLCK/MYLK       | 96.85  | 95.78  | 96.31  |
| MLCK2/MYLK2     | 109.78 | 108.59 | 109.18 |
| MLK1/MAP3K9     | 100.38 | 98.84  | 99.61  |
| MLK2/MAP3K10    | 105.78 | 102.01 | 103.90 |
| MLK3/MAP3K11    | 83.79  | 83.13  | 83.46  |
| MLK4            | 103.22 | 102.03 | 102.62 |
| MNK1            | 83.04  | 80.06  | 81.55  |
| MNK2            | 98.18  | 91.53  | 94.86  |
| MRCKa/CDC42BPA  | 112.79 | 111.59 | 112.19 |
| MRCKb/CDC42BPB  | 105.42 | 105.21 | 105.32 |
| MSK1/RPS6KA5    | 101.36 | 99.93  | 100.64 |
| MSK2/RPS6KA4    | 93.47  | 91.90  | 92.69  |
| MSSK1/STK23     | 99.80  | 97.39  | 98.59  |
| MST1/STK4       | 97.03  | 96.33  | 96.68  |
| MST2/STK3       | 91.53  | 87.88  | 89.71  |
| MST3/STK24      | 90.79  | 89.79  | 90.29  |
| MST4            | 94.91  | 94.17  | 94.54  |
| MUSK            | 91.08  | 89.44  | 90.26  |
| MYLK3           | 101.16 | 100.94 | 101.05 |
| MYLK4           | 108.41 | 104.98 | 106.70 |
| MYO3A           | 96.20  | 96.13  | 96.16  |
| MYO3b           | 110.53 | 105.64 | 108.09 |
| NEK1            | 66.74  | 66.26  | 66.50  |
| NEK11           | 67.36  | 65.63  | 66.50  |
| NEK2            | 112.14 | 111.81 | 111.98 |
| NEK3            | 96.38  | 95.32  | 95.85  |
| NEK4            | 98.17  | 96.05  | 97.11  |
| NEK5            | 95.80  | 93.70  | 94.75  |
| NEK6            | 97.76  | 94.71  | 96.24  |
| NEK7            | 96.68  | 94.21  | 95.44  |
| NEK8            | 87.82  | 86.84  | 87.33  |
| NEK9            | 83.65  | 82.94  | 83.29  |
| NIM1            | 110.65 | 107.61 | 109.13 |
| NLK             | 109.18 | 105.22 | 107.20 |
| OSR1/OXSR1      | 99.28  | 98.02  | 98.65  |
| P38a/MAPK14     | 99.85  | 97.95  | 98.90  |
| P38b/MAPK11     | 103.15 | 99.48  | 101.32 |
| P38d/MAPK13     | 101.22 | 100.85 | 101.03 |
| P38g            | 93.23  | 92.29  | 92.76  |
| p70S6K/RPS6KB1  | 100.41 | 99.37  | 99.89  |
| p70S6Kb/RPS6KB2 | 98.38  | 90.97  | 94.67  |
| PAK1            | 92.87  | 92.34  | 92.60  |
| PAK2            | 98.46  | 96.30  | 97.38  |
| PAK3            | 99.69  | 98.90  | 99.29  |

|             |        |        |        |
|-------------|--------|--------|--------|
| PAK4        | 108.70 | 103.59 | 106.14 |
| PAK5        | 111.68 | 108.33 | 110.01 |
| PAK6        | 95.33  | 94.84  | 95.09  |
| PASK        | 105.11 | 104.62 | 104.87 |
| PBK/TOPK    | 123.21 | 120.43 | 121.82 |
| PDGFRa      | 102.13 | 99.40  | 100.77 |
| PDGFRb      | 97.30  | 94.87  | 96.09  |
| PDK1/PDPK1  | 93.52  | 90.32  | 91.92  |
| PEAK1       | 83.66  | 83.13  | 83.39  |
| PHKg1       | 93.05  | 90.72  | 91.89  |
| PHKg2       | 101.20 | 94.82  | 98.01  |
| PIM1        | 93.11  | 91.76  | 92.43  |
| PIM2        | 94.95  | 90.96  | 92.95  |
| PIM3        | 94.63  | 94.52  | 94.58  |
| PKA         | 91.70  | 89.69  | 90.70  |
| PKAcb       | 105.55 | 103.46 | 104.50 |
| PKAcb       | 103.78 | 102.91 | 103.35 |
| PKCa        | 102.78 | 102.67 | 102.72 |
| PKCb1       | 92.92  | 92.23  | 92.57  |
| PKCb2       | 99.19  | 98.60  | 98.89  |
| PKCd        | 98.90  | 97.67  | 98.29  |
| PKCepsilon  | 105.57 | 104.17 | 104.87 |
| PKCeta      | 102.51 | 102.14 | 102.32 |
| PKCg        | 96.67  | 96.06  | 96.36  |
| PKCiota     | 99.84  | 98.37  | 99.11  |
| PKCmu/PRKD1 | 101.96 | 99.32  | 100.64 |
| PKCnu/PRKD3 | 95.54  | 92.08  | 93.81  |
| PKCtheta    | 89.69  | 89.26  | 89.48  |
| PKCzeta     | 106.94 | 105.13 | 106.03 |
| PKD2/PRKD2  | 102.44 | 99.83  | 101.13 |
| PKG1a       | 91.83  | 91.61  | 91.72  |
| PKG1b       | 93.61  | 93.47  | 93.54  |
| PKG2/PRKG2  | 110.94 | 104.44 | 107.69 |
| PKMYT1      | 96.07  | 92.85  | 94.46  |
| PKN1/PRK1   | 95.18  | 92.84  | 94.01  |
| PKN2/PRK2   | 93.67  | 92.52  | 93.09  |
| PKN3/PRK3   | 94.87  | 90.36  | 92.61  |
| PLK1        | 97.76  | 97.06  | 97.41  |
| PLK2        | 75.49  | 74.11  | 74.80  |
| PLK3        | 105.84 | 105.77 | 105.80 |
| PLK4/SAK    | 89.65  | 85.32  | 87.48  |
| PRKX        | 91.28  | 85.97  | 88.62  |
| PYK2        | 102.32 | 101.85 | 102.09 |
| RAF1        | 100.43 | 99.46  | 99.94  |
| RET         | 94.09  | 93.55  | 93.82  |
| RIPK2       | 109.75 | 109.39 | 109.57 |
| RIPK3       | 112.77 | 111.93 | 112.35 |
| RIPK4       | 100.79 | 100.00 | 100.40 |
| RIPK5       | 99.21  | 99.01  | 99.11  |
| ROCK1       | 106.57 | 104.34 | 105.45 |
| ROCK2       | 109.13 | 106.84 | 107.99 |
| RON/MST1R   | 101.39 | 101.16 | 101.28 |
| ROS/ROS1    | 92.14  | 91.87  | 92.00  |

|              |        |        |        |
|--------------|--------|--------|--------|
| RSK1         | 88.75  | 86.83  | 87.79  |
| RSK2         | 83.56  | 81.87  | 82.71  |
| RSK3         | 113.38 | 109.97 | 111.68 |
| RSK4         | 91.21  | 90.28  | 90.75  |
| SBK1         | 99.90  | 99.87  | 99.89  |
| SGK1         | 95.44  | 94.44  | 94.94  |
| SGK2         | 90.17  | 87.21  | 88.69  |
| SGK3/SGKL    | 103.41 | 97.64  | 100.53 |
| SIK1         | 92.77  | 91.71  | 92.24  |
| SIK2         | 101.27 | 100.66 | 100.97 |
| SIK3         | 112.28 | 110.45 | 111.37 |
| SLK/STK2     | 97.18  | 96.88  | 97.03  |
| SNARK/NUAK2  | 105.86 | 103.91 | 104.88 |
| SNRK         | 84.67  | 84.64  | 84.65  |
| SRMS         | 92.32  | 90.84  | 91.58  |
| SRPK1        | 97.97  | 96.22  | 97.09  |
| SRPK2        | 92.48  | 92.45  | 92.47  |
| SSTK/TSSK6   | 97.46  | 96.80  | 97.13  |
| STK16        | 111.28 | 110.69 | 110.98 |
| STK21/CIT    | 117.07 | 114.50 | 115.78 |
| STK22D/TSSK1 | 95.53  | 94.31  | 94.92  |
| STK25/YSK1   | 87.15  | 86.47  | 86.81  |
| STK32B/YANK2 | 101.61 | 100.44 | 101.02 |
| STK32C/YANK3 | 97.19  | 96.92  | 97.06  |
| STK33        | 86.52  | 82.53  | 84.52  |
| STK38/NDR1   | 94.39  | 93.50  | 93.95  |
| STK38L/NDR2  | 97.96  | 97.86  | 97.91  |
| STK39/STLK3  | 99.54  | 98.59  | 99.07  |
| SYK          | 104.76 | 104.12 | 104.44 |
| TAK1         | 102.72 | 102.49 | 102.60 |
| TAOK1        | 105.73 | 105.48 | 105.61 |
| TAOK2/TAO1   | 85.71  | 84.93  | 85.32  |
| TAOK3/JIK    | 103.03 | 101.70 | 102.36 |
| TBK1         | 98.49  | 98.26  | 98.37  |
| TEC          | 121.23 | 119.94 | 120.59 |
| TESK1        | 86.34  | 86.09  | 86.21  |
| TESK2        | 98.08  | 95.39  | 96.74  |
| TGFBR2       | 89.32  | 86.82  | 88.07  |
| TIE2/TEK     | 81.08  | 79.82  | 80.45  |
| TLK1         | 98.79  | 96.94  | 97.87  |
| TLK2         | 122.29 | 120.35 | 121.32 |
| TNIK         | 73.17  | 72.09  | 72.63  |
| TNK1         | 100.53 | 97.42  | 98.97  |
| TRKA         | 92.53  | 91.97  | 92.25  |
| TRKB         | 88.78  | 81.51  | 85.15  |
| TRKC         | 98.99  | 94.55  | 96.77  |
| TSSK2        | 111.19 | 110.54 | 110.86 |
| TSSK3/STK22C | 108.30 | 105.94 | 107.12 |
| TTBK1        | 92.96  | 89.41  | 91.18  |
| TTBK2        | 106.34 | 106.04 | 106.19 |
| TXK          | 90.39  | 90.01  | 90.20  |
| TYK1/LTK     | 99.00  | 98.65  | 98.83  |
| TYK2         | 100.95 | 99.70  | 100.32 |



|                |        |        |        |
|----------------|--------|--------|--------|
| TYRO3/SKY      | 72.37  | 70.71  | 71.54  |
| ULK1           | 100.31 | 98.78  | 99.55  |
| ULK2           | 98.30  | 95.66  | 96.98  |
| ULK3           | 111.03 | 103.67 | 107.35 |
| VRK1           | 93.80  | 92.41  | 93.11  |
| VRK2           | 101.80 | 98.92  | 100.36 |
| WEE1           | 111.39 | 105.50 | 108.45 |
| WNK1           | 102.78 | 102.61 | 102.69 |
| WNK2           | 106.80 | 103.65 | 105.22 |
| WNK3           | 97.42  | 93.81  | 95.62  |
| YES/YES1       | 100.22 | 96.64  | 98.43  |
| YSK4/MAP3K19   | 99.13  | 98.83  | 98.98  |
| ZAK/MLTK       | 92.91  | 92.83  | 92.87  |
| ZAP70          | 118.14 | 112.71 | 115.43 |
| ZIPK/DAPK3     | 94.26  | 94.19  | 94.23  |
| AMPK(A1/B1/G1) | 110.52 | 110.07 | 110.30 |
| AMPK(A1/B1/G2) | 101.07 | 98.19  | 99.63  |
| AMPK(A1/B1/G3) | 109.60 | 109.43 | 109.51 |
| AMPK(A1/B2/G1) | 109.93 | 108.57 | 109.25 |
| AMPK(A2/B1/G1) | 115.93 | 108.57 | 112.25 |
| AMPK(A2/B2/G1) | 105.07 | 101.79 | 103.43 |
| AMPK(A2/B2/G2) | 109.53 | 108.89 | 109.21 |
| AMPK(A2/B2/G3) | 95.47  | 93.04  | 94.25  |
| DNA-PK         | 109.13 | 101.72 | 105.42 |
| EEF2K          | 98.91  | 94.28  | 96.60  |
| EIF2AK1        | 113.62 | 109.36 | 111.49 |
| EIF2AK2        | 102.00 | 101.11 | 101.55 |
| EIF2AK3        | 49.56  | 47.08  | 48.32  |
| EIF2AK4        | 91.71  | 90.66  | 91.18  |
| mTOR/FRAP1     | 105.19 | 94.65  | 99.92  |
| PDK1/PDHK1     | 100.97 | 100.26 | 100.62 |
| PDK2/PDHK2     | 106.85 | 101.49 | 104.17 |
| PDK3/PDHK3     | 104.20 | 102.96 | 103.58 |
| PDK4/PDHK4     | 89.98  | 89.83  | 89.91  |
| TRPM7/CHAK1    | 145.94 | 144.73 | 145.34 |

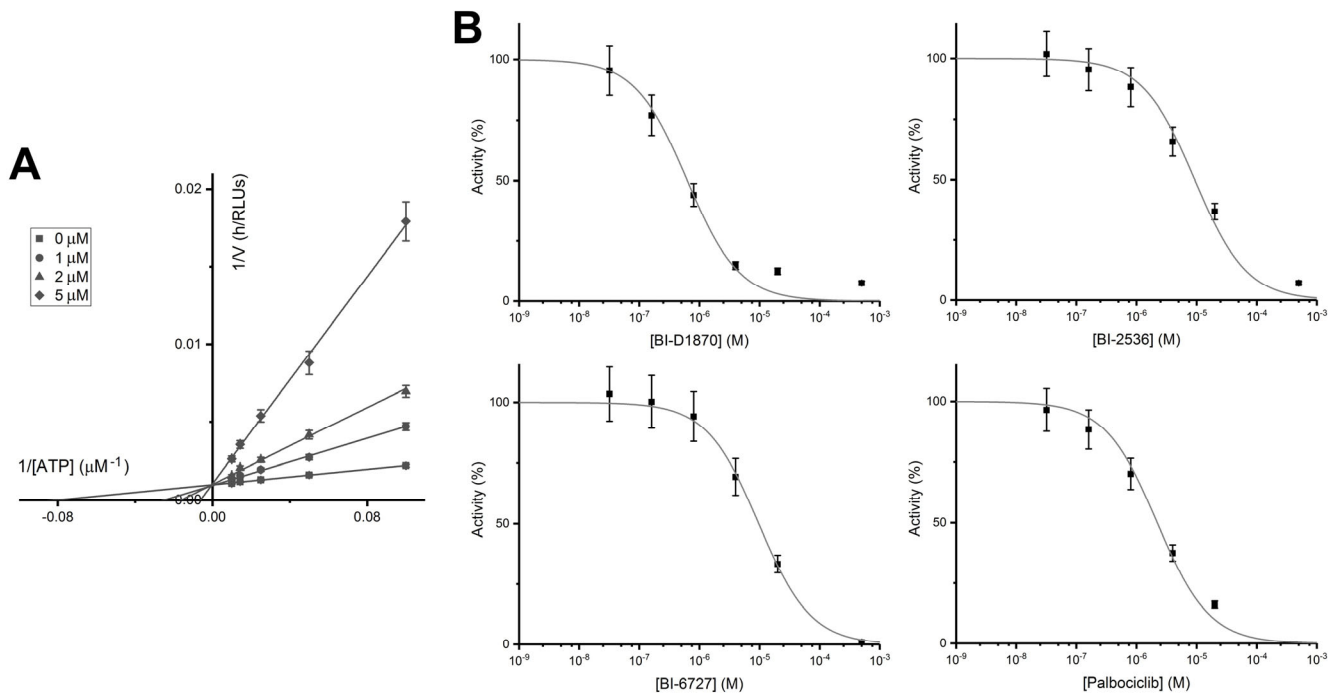

**Figure S1**

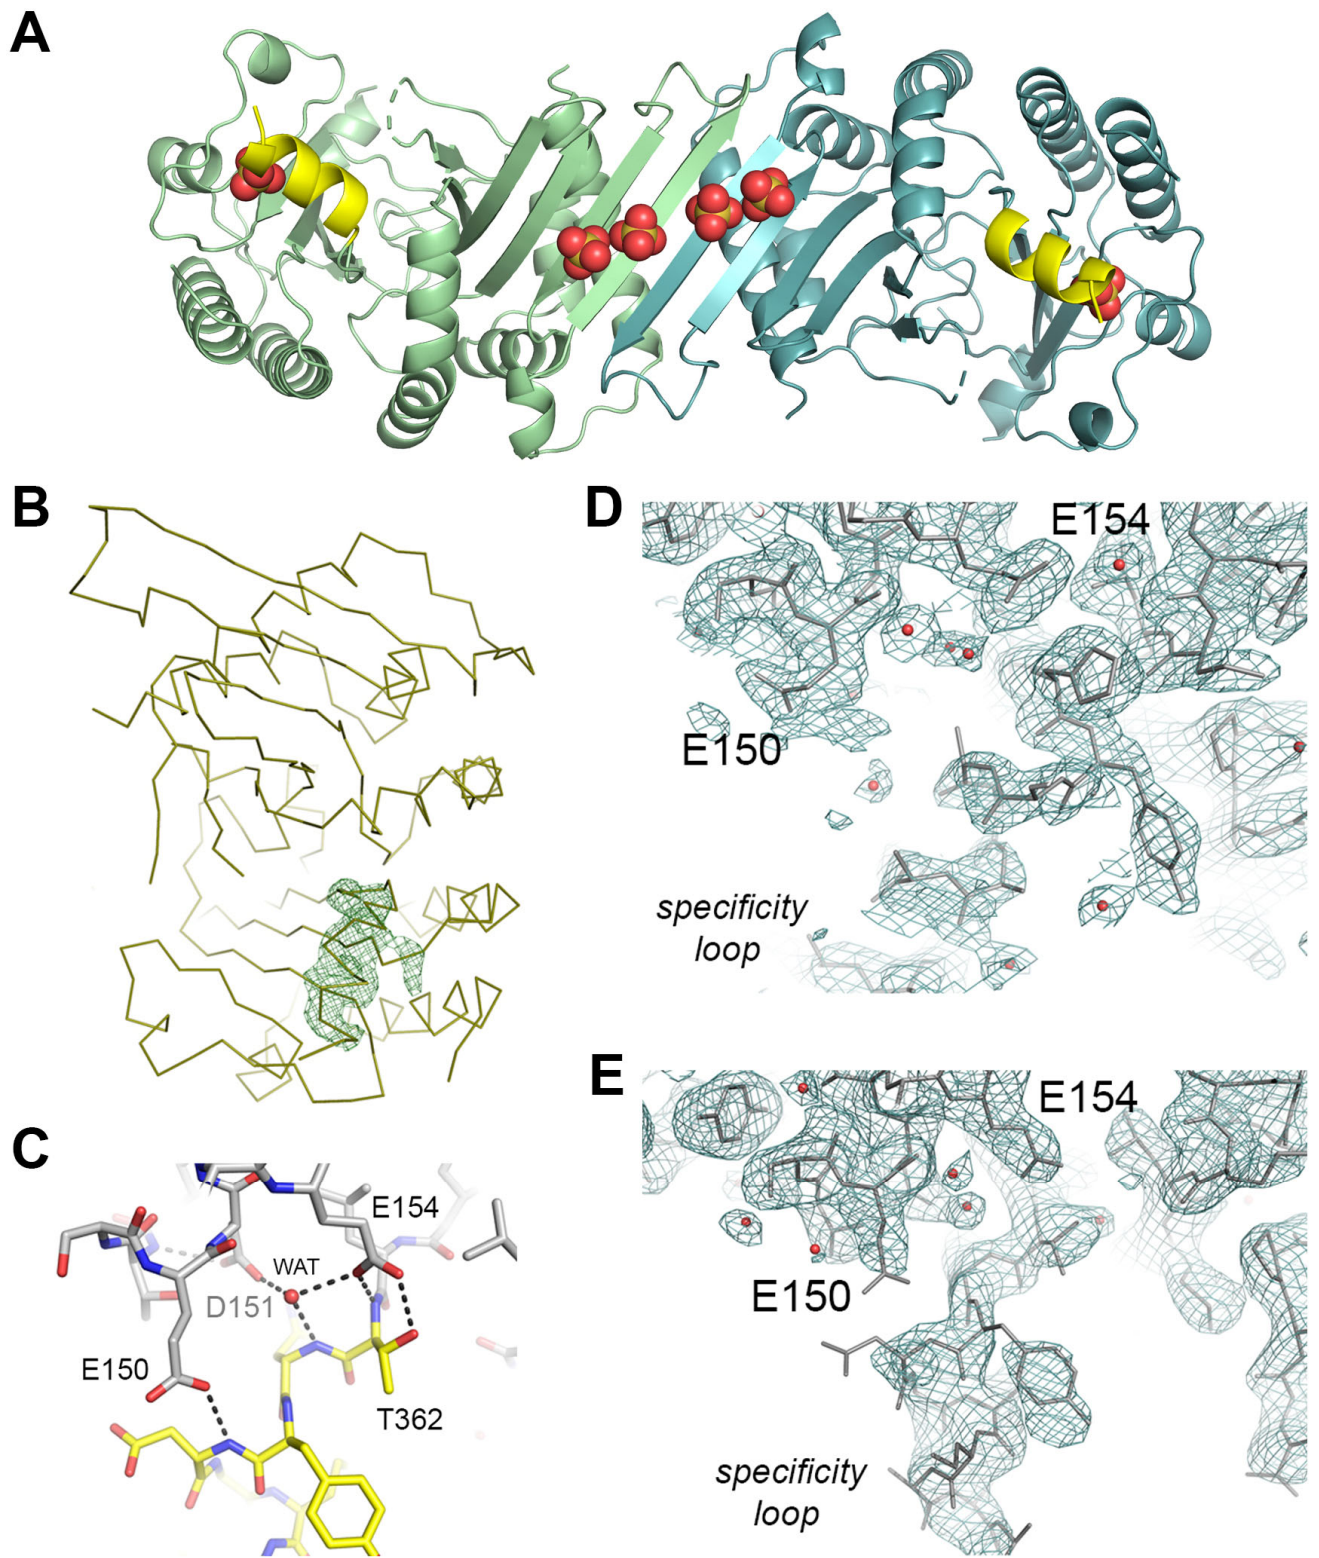

**Figure S2**

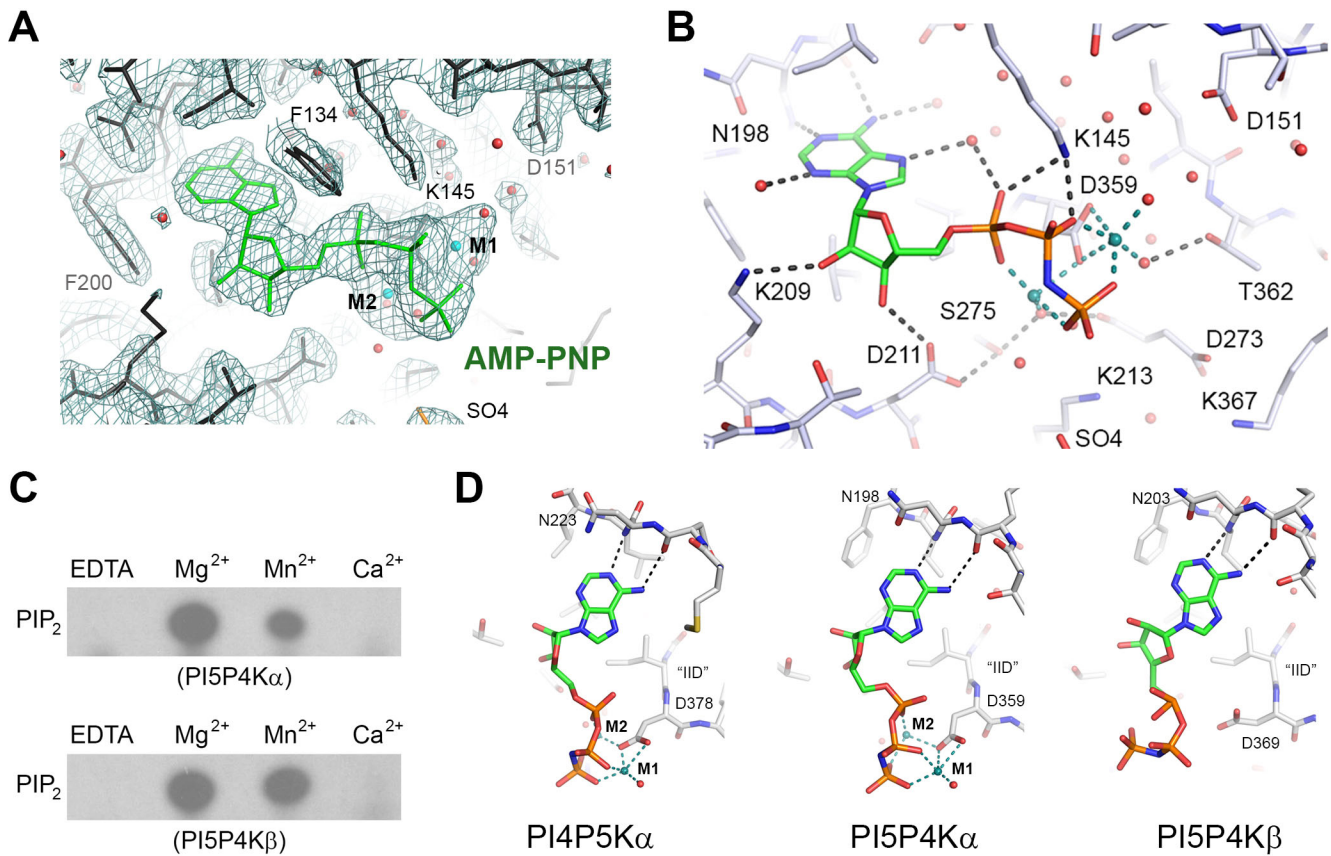

**Figure S3**

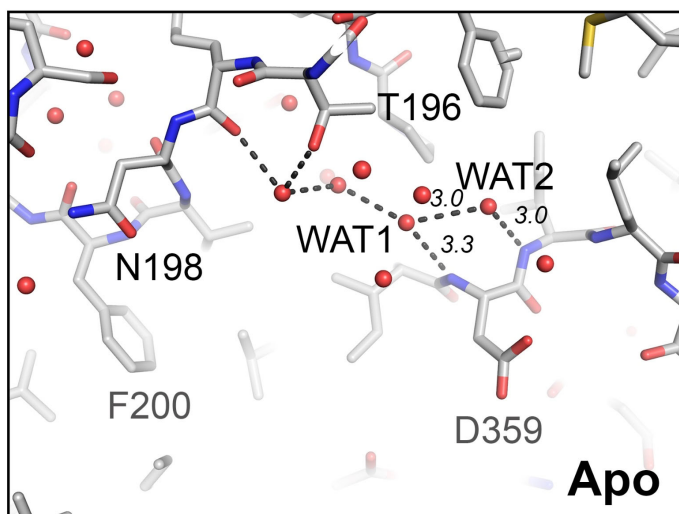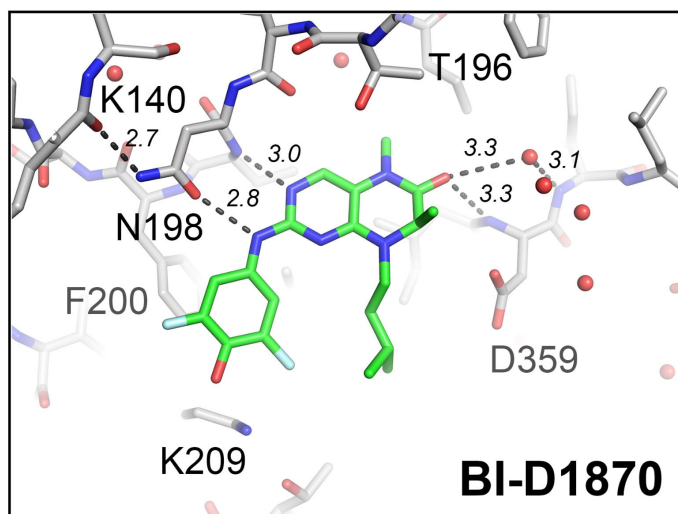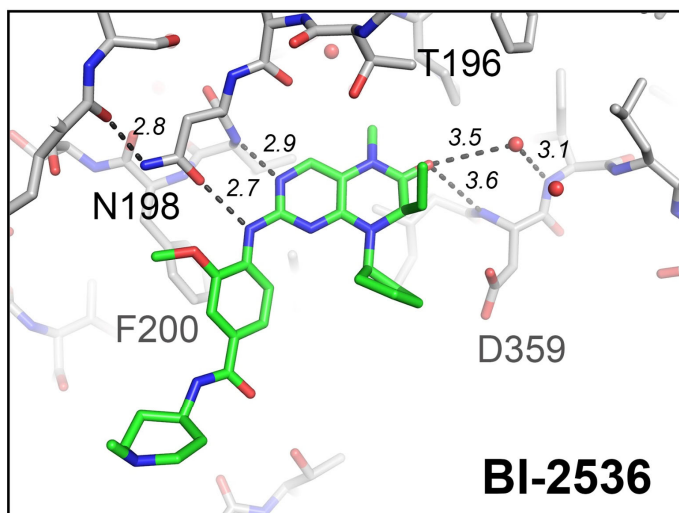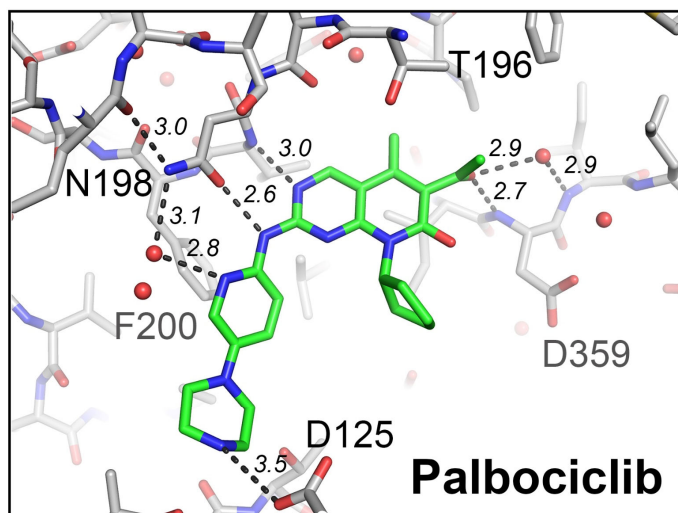

**Figure S4**



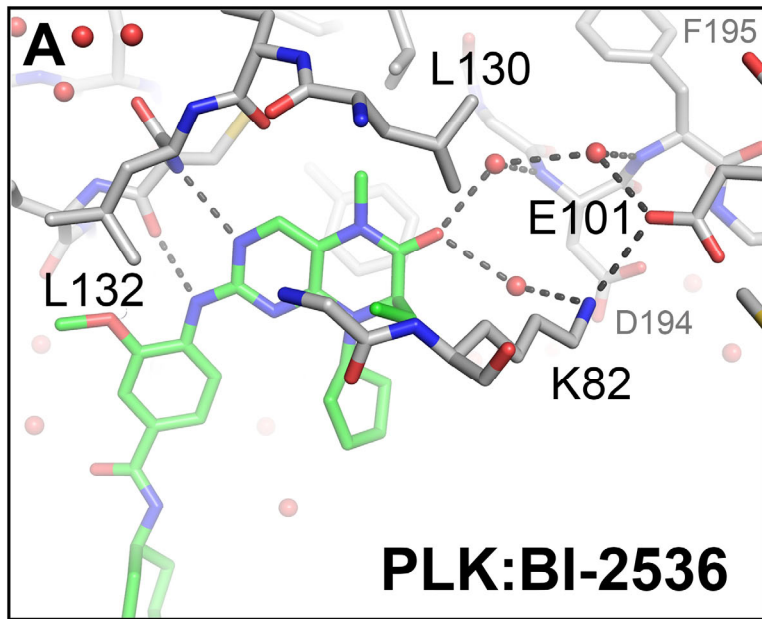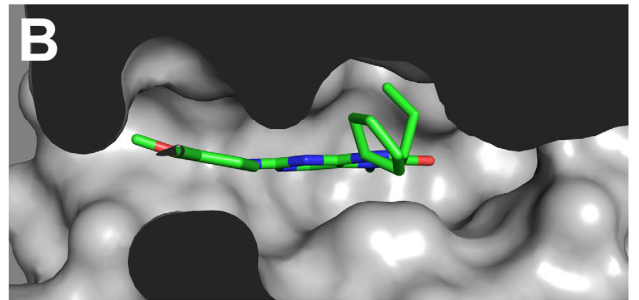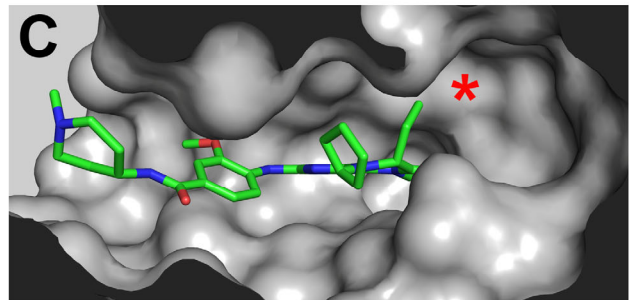

**Figure S5**

**A**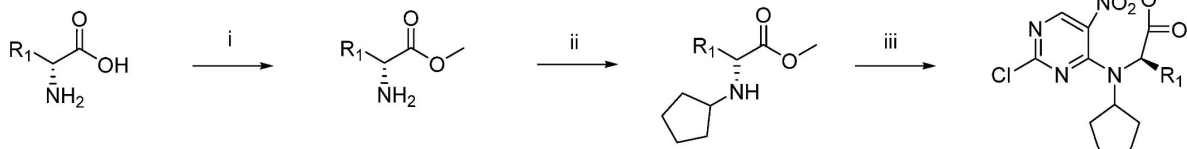**1a:** R<sub>1</sub> = CH<sub>2</sub>cyclopentyl**1b:** R<sub>1</sub> = CH<sub>2</sub>cyclohexyl**1c:** R<sub>1</sub> = isopropyl**1d:** R<sub>1</sub> = isobutyl**2a:** R<sub>1</sub> = CH<sub>2</sub>cyclopentyl**2b:** R<sub>1</sub> = CH<sub>2</sub>cyclohexyl**2c:** R<sub>1</sub> = isopropyl**2d:** R<sub>1</sub> = isobutyl**3a:** R<sub>1</sub> = CH<sub>2</sub>cyclopentyl**3b:** R<sub>1</sub> = CH<sub>2</sub>cyclohexyl**3c:** R<sub>1</sub> = isopropyl**3d:** R<sub>1</sub> = isobutyl**4a:** R<sub>1</sub> = CH<sub>2</sub>cyclopentyl**4b:** R<sub>1</sub> = CH<sub>2</sub>cyclohexyl**4c:** R<sub>1</sub> = isopropyl**4d:** R<sub>1</sub> = isobutyl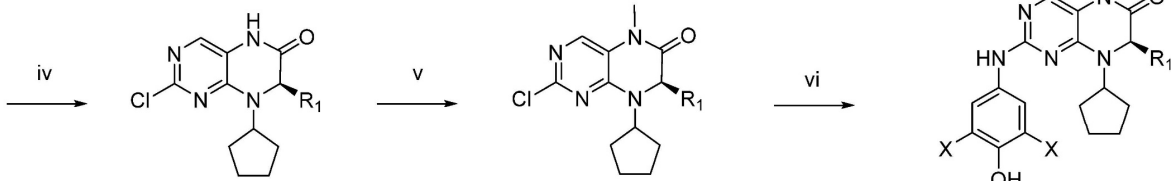**5a:** R<sub>1</sub> = CH<sub>2</sub>cyclopentyl**5b:** R<sub>1</sub> = CH<sub>2</sub>cyclohexyl**5c:** R<sub>1</sub> = isopropyl**5d:** R<sub>1</sub> = isobutyl**6a:** R<sub>1</sub> = CH<sub>2</sub>cyclopentyl**6b:** R<sub>1</sub> = CH<sub>2</sub>cyclohexyl**6c:** R<sub>1</sub> = isopropyl**6d:** R<sub>1</sub> = isobutyl**CC260:** R<sub>1</sub> = CH<sub>2</sub>cyclopentyl, X = Cl**CC314:** R<sub>1</sub> = CH<sub>2</sub>cyclohexyl, X = Cl**CC262:** R<sub>1</sub> = isopropyl, X = F**CC259:** R<sub>1</sub> = isobutyl, X = Cl**B**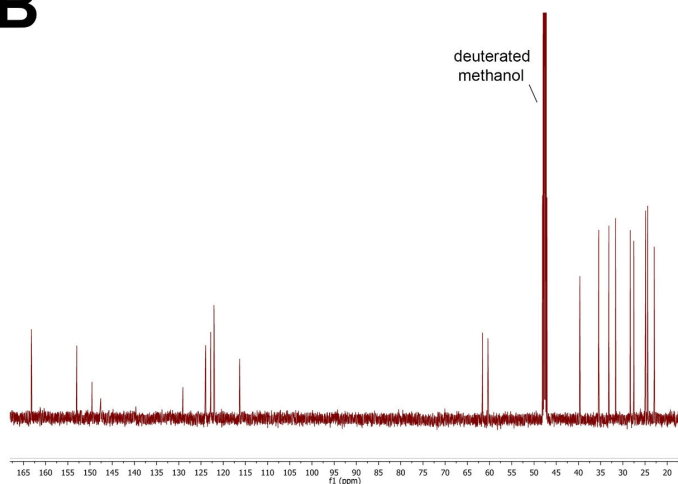**C**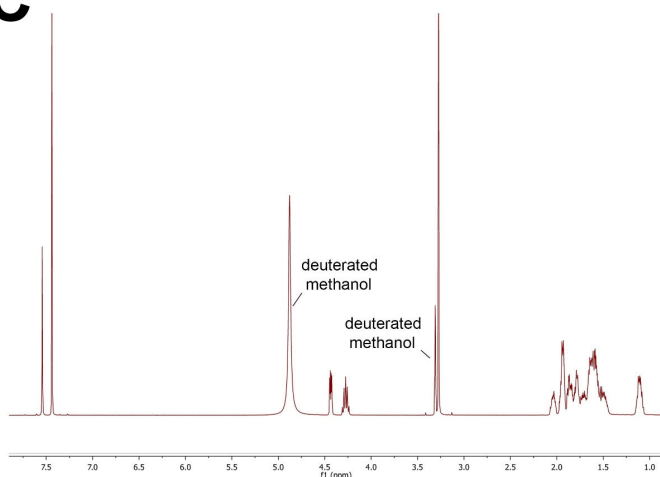**Figure S6**

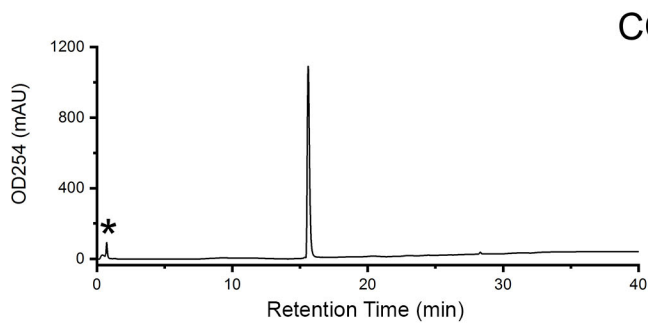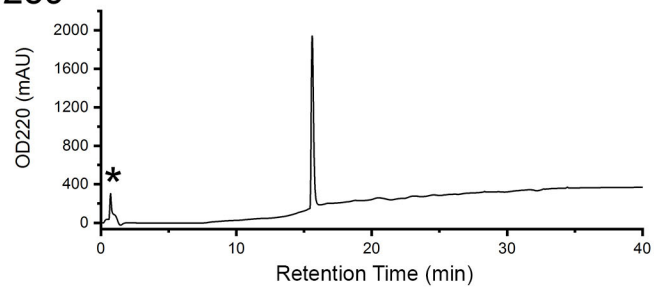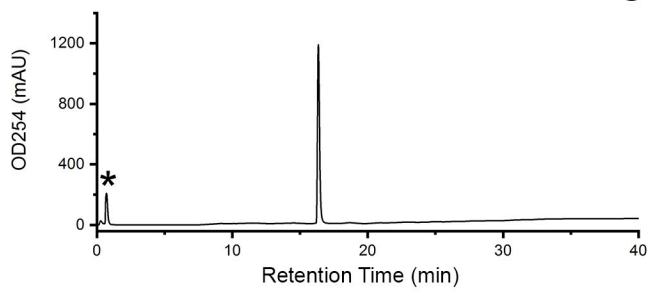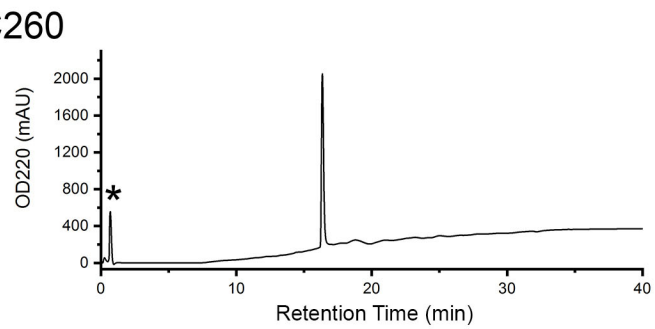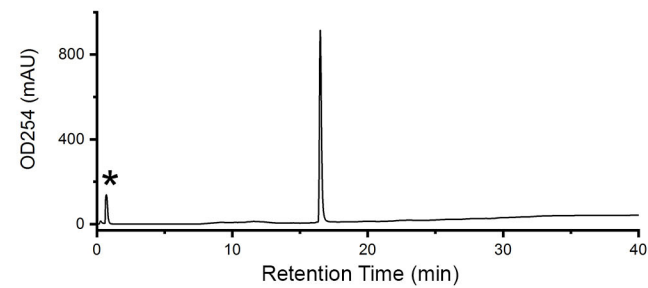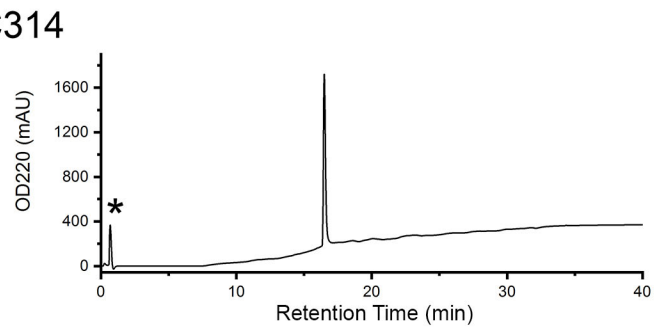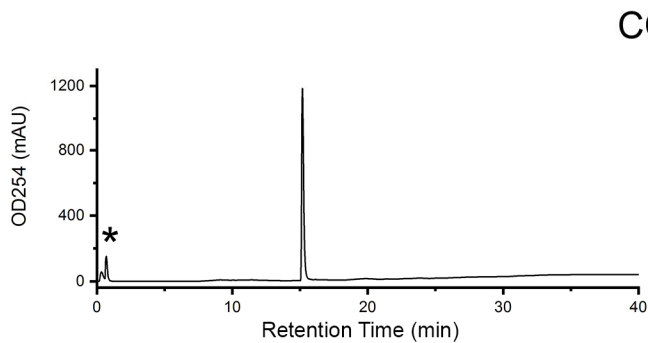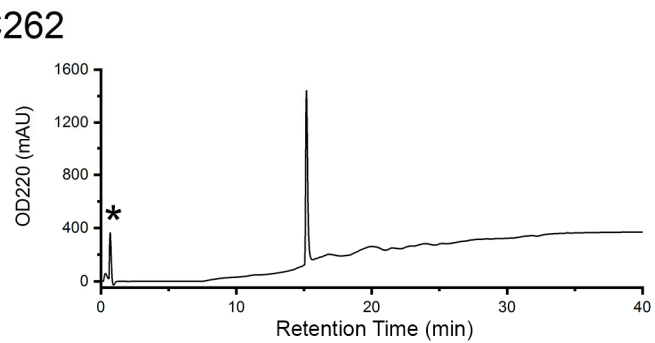

**O.D. at 254 nm**

**O.D. at 220 nm**

**Figure S7**



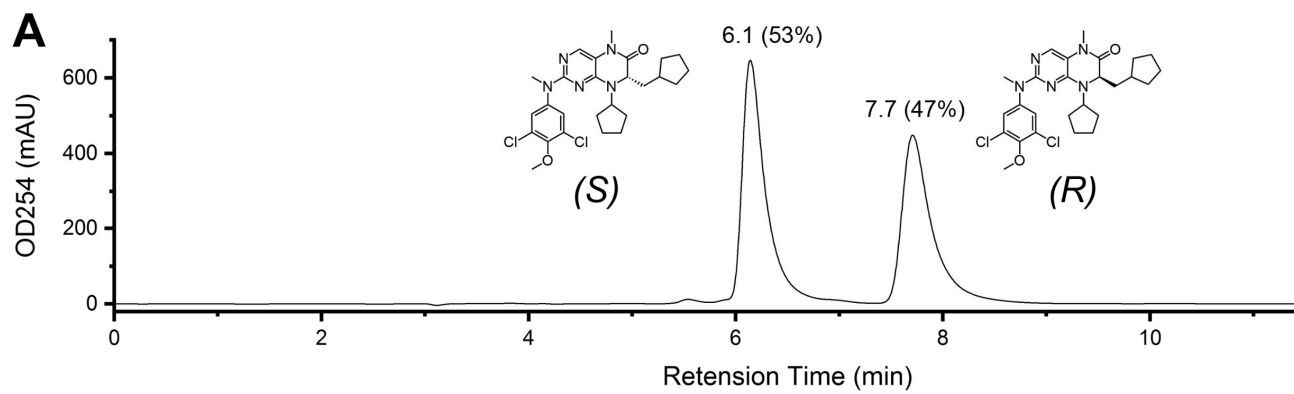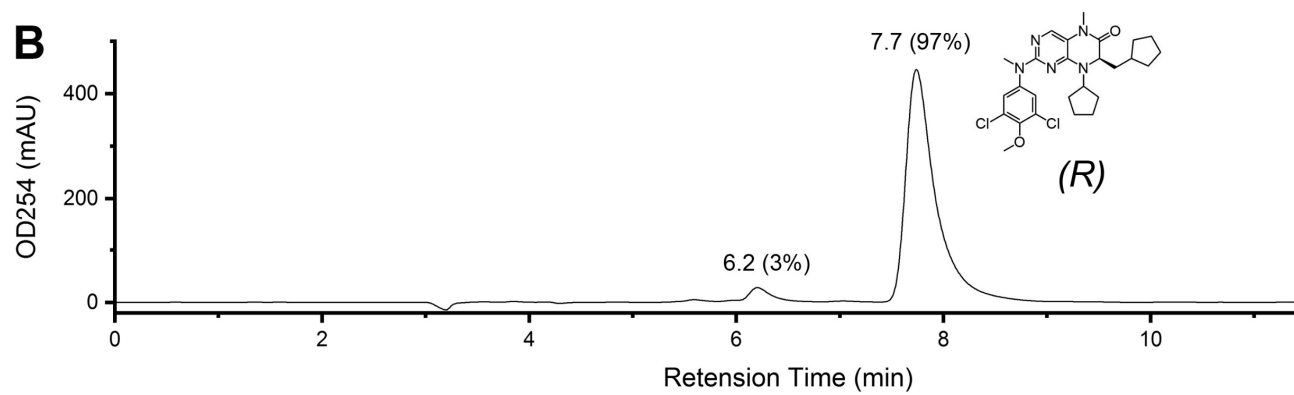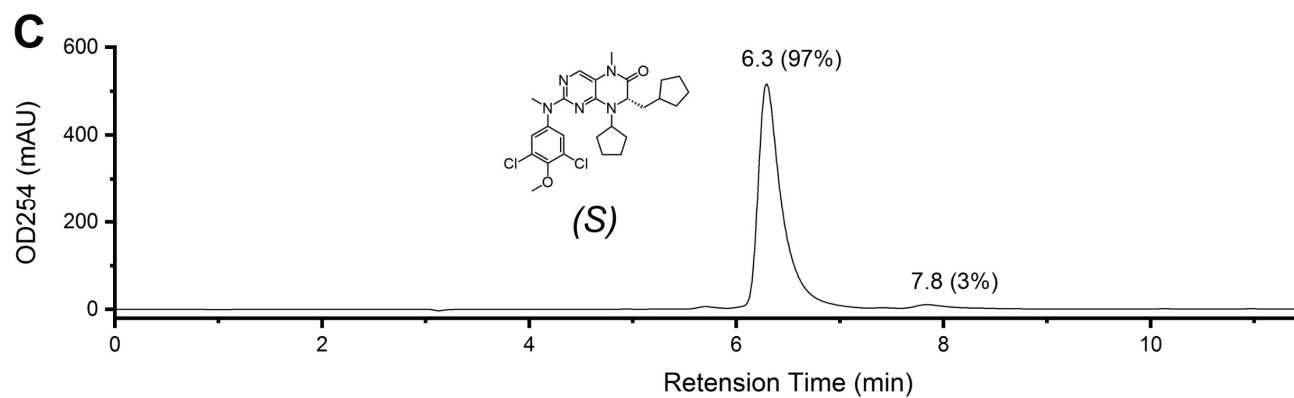

**Figure S8**

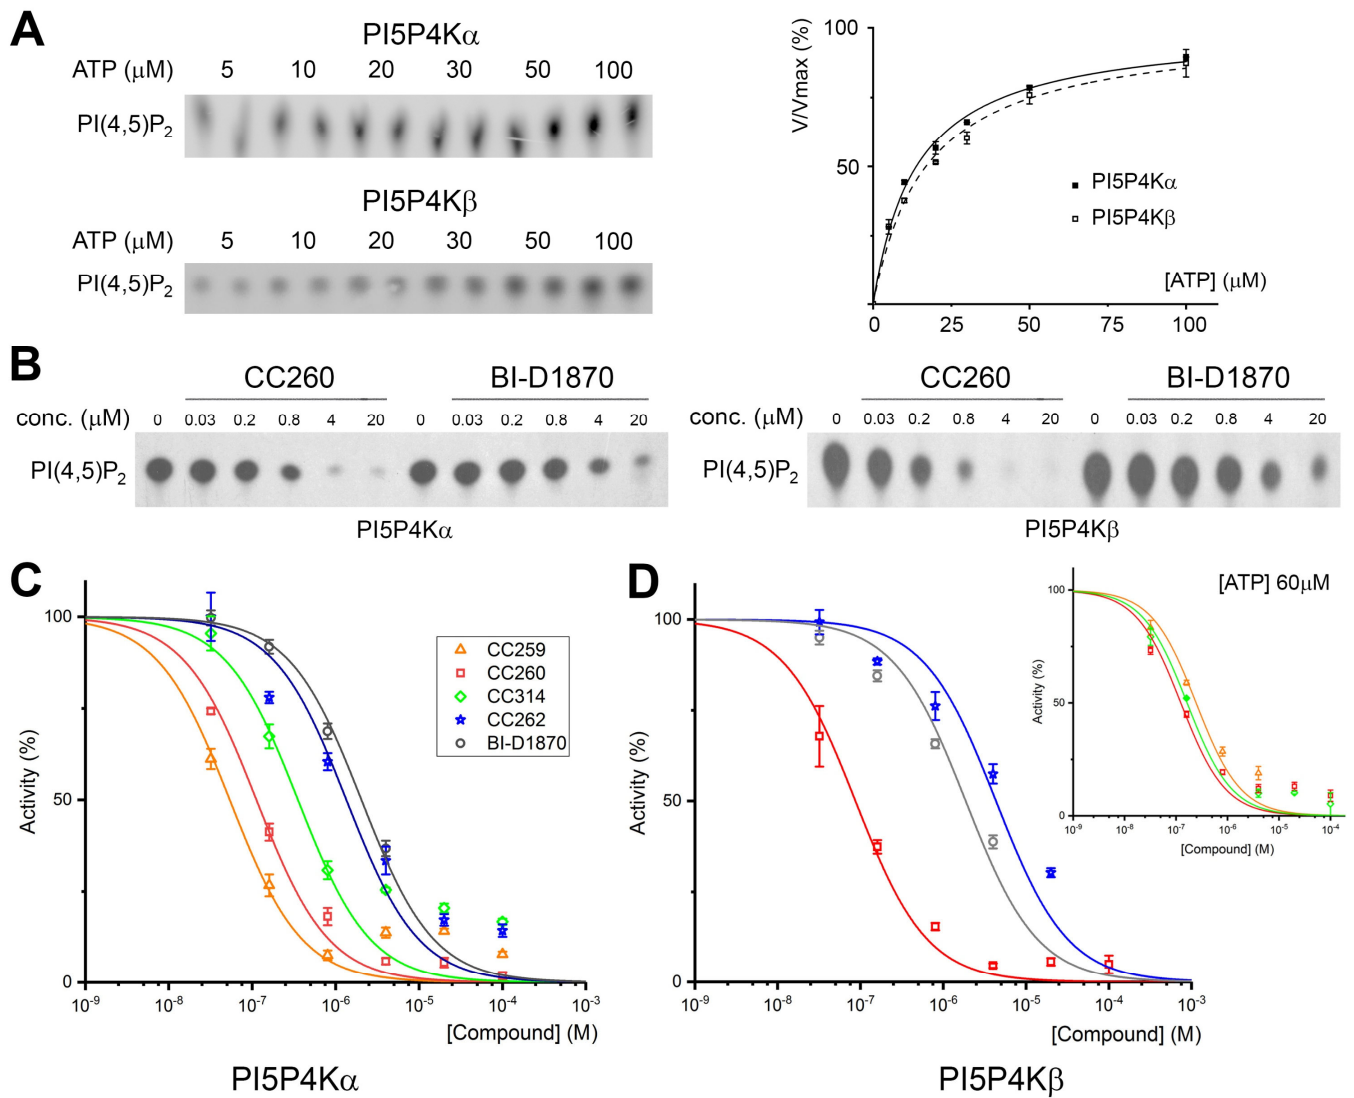

Figure S9

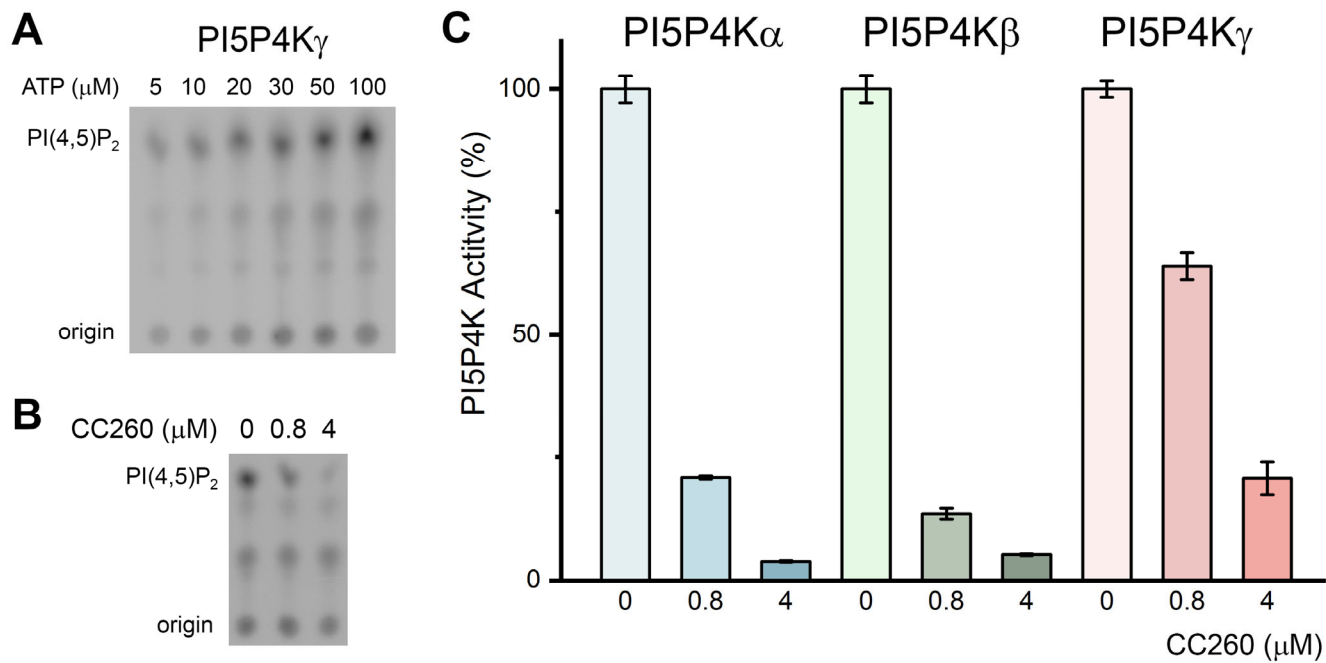

**Figure S10**

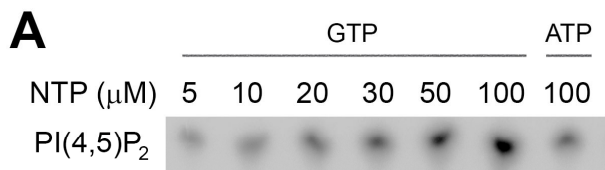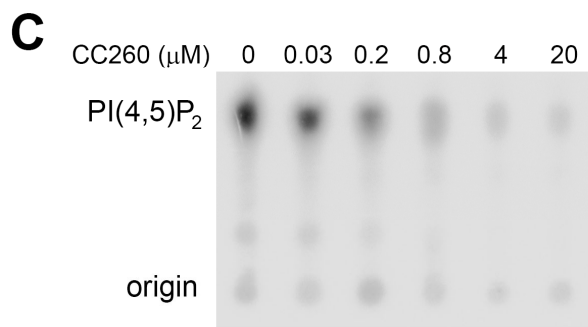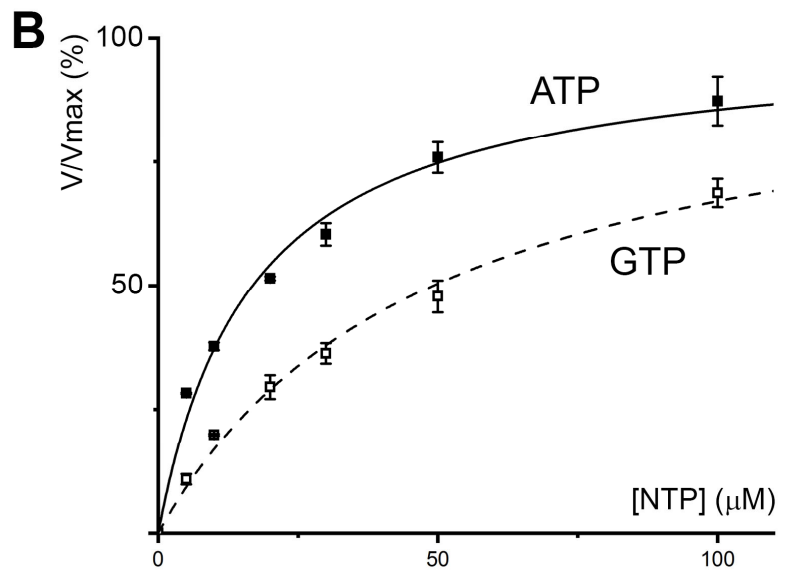

**Figure S11**

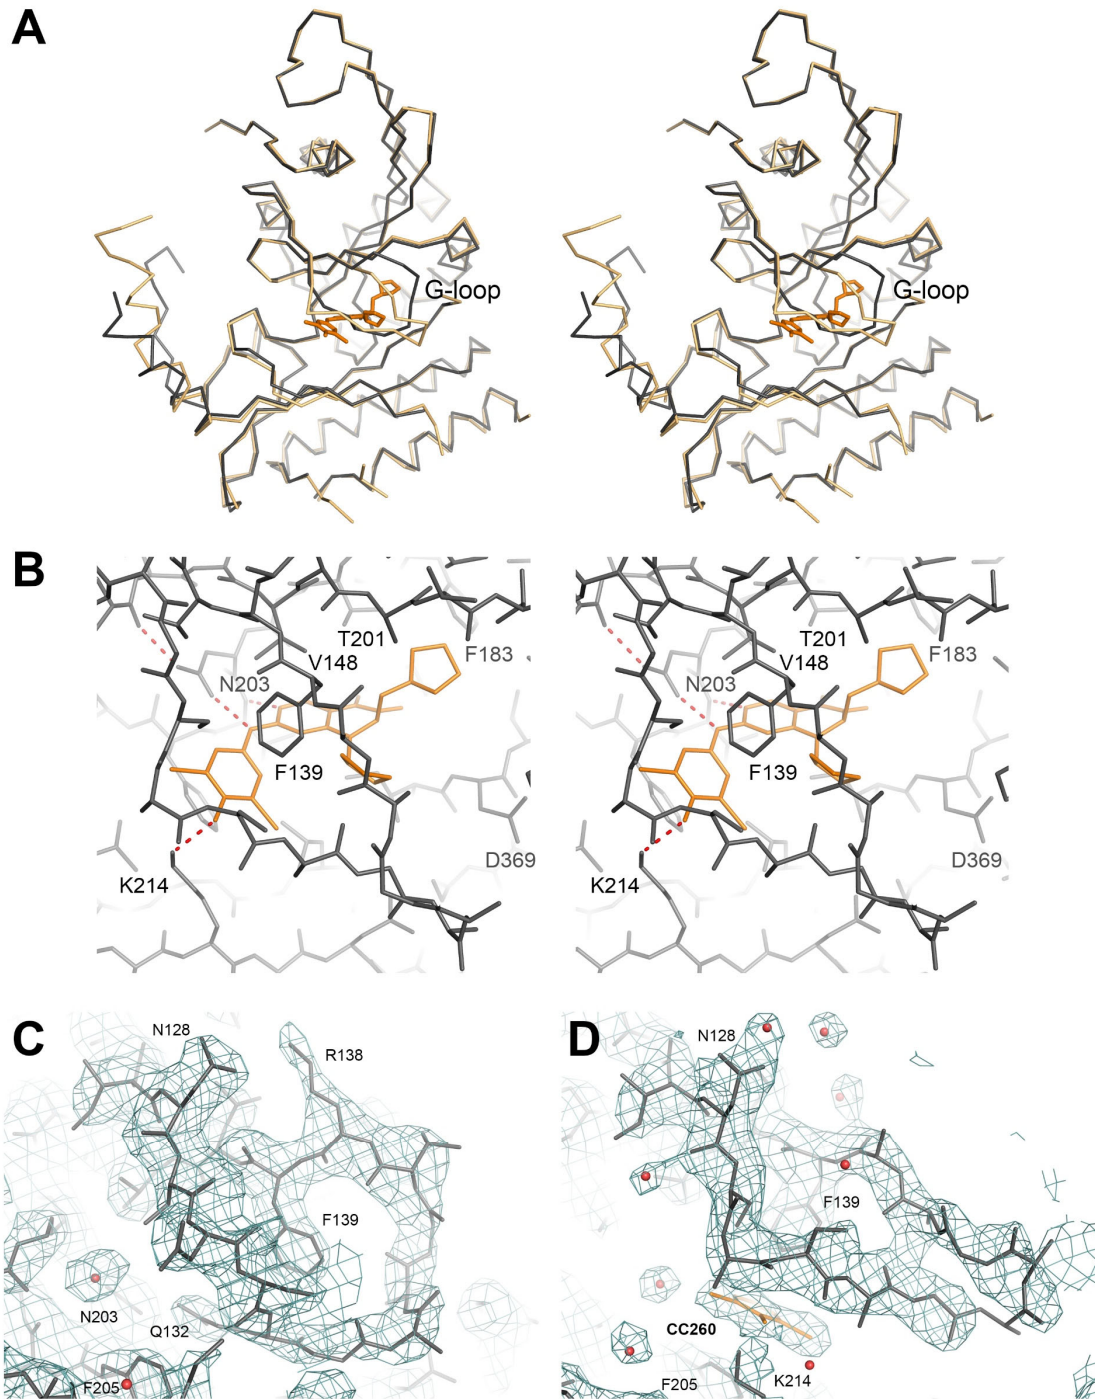

**Figure S12**

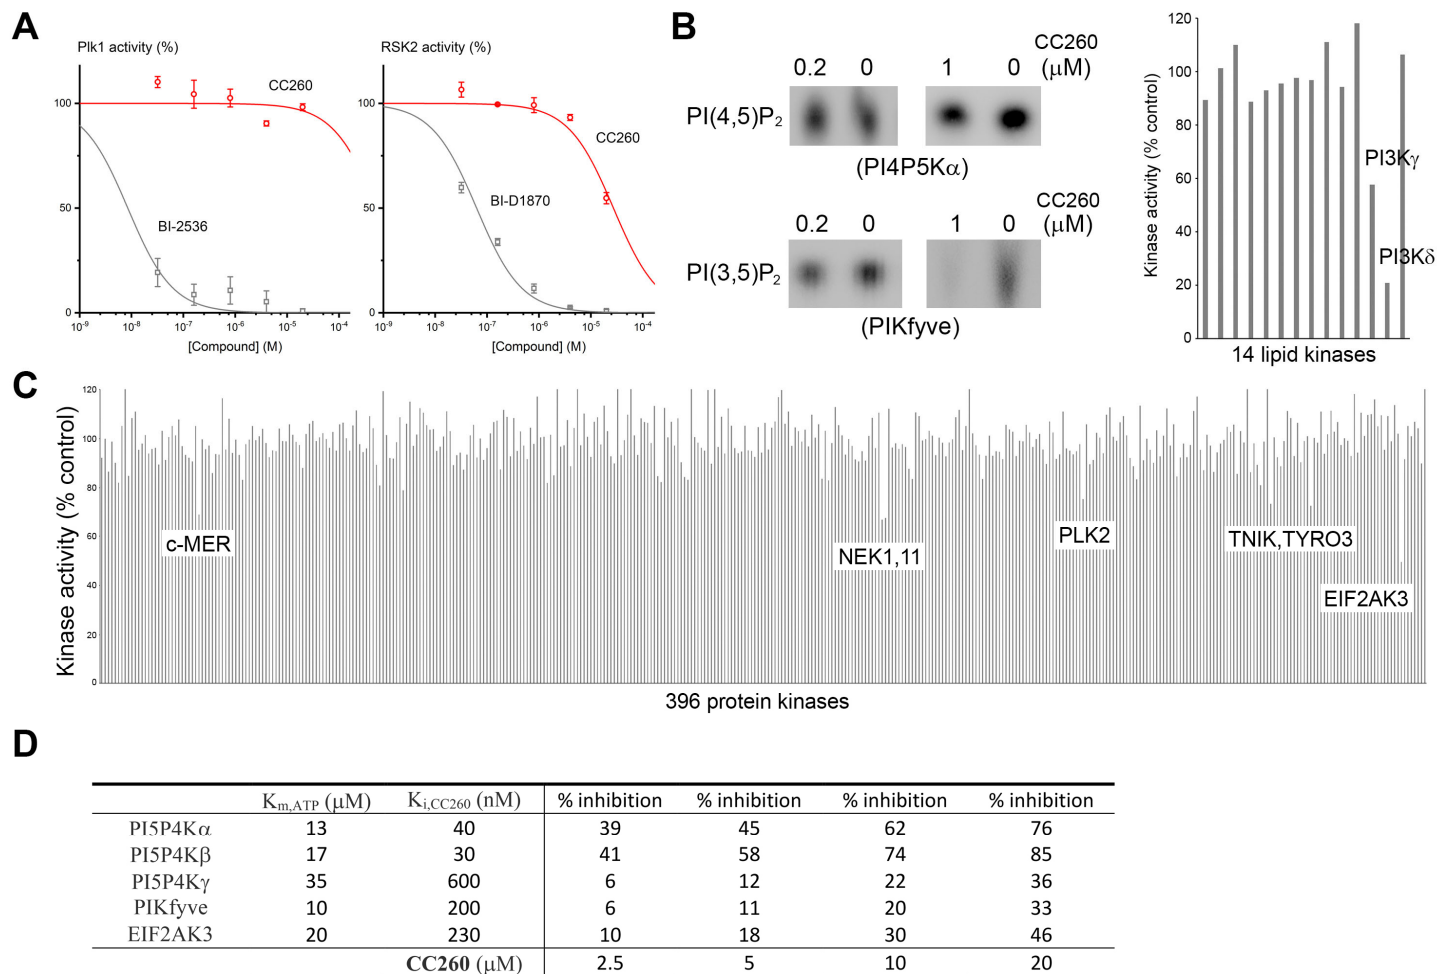

**Figure S13**

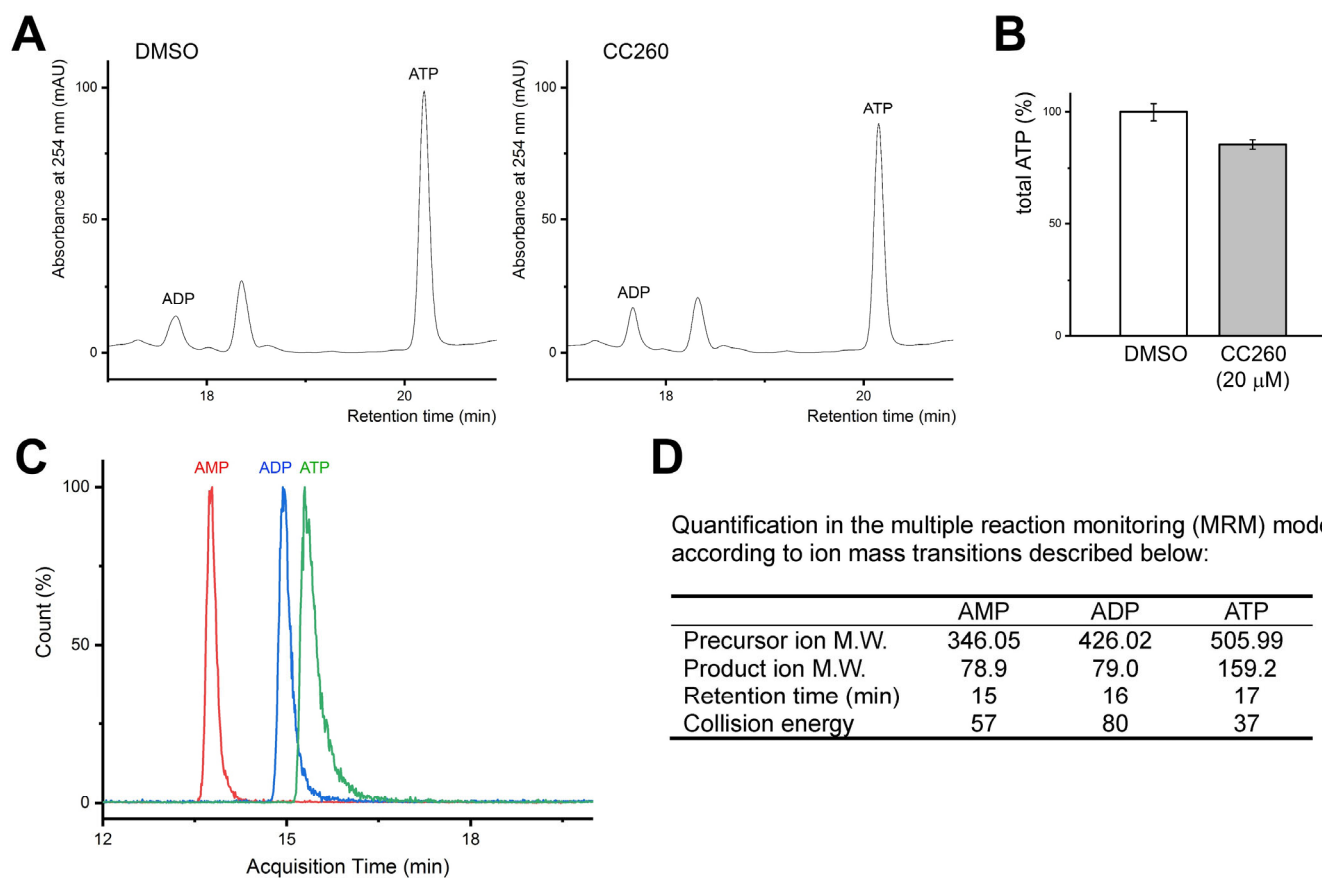

**Figure S14**

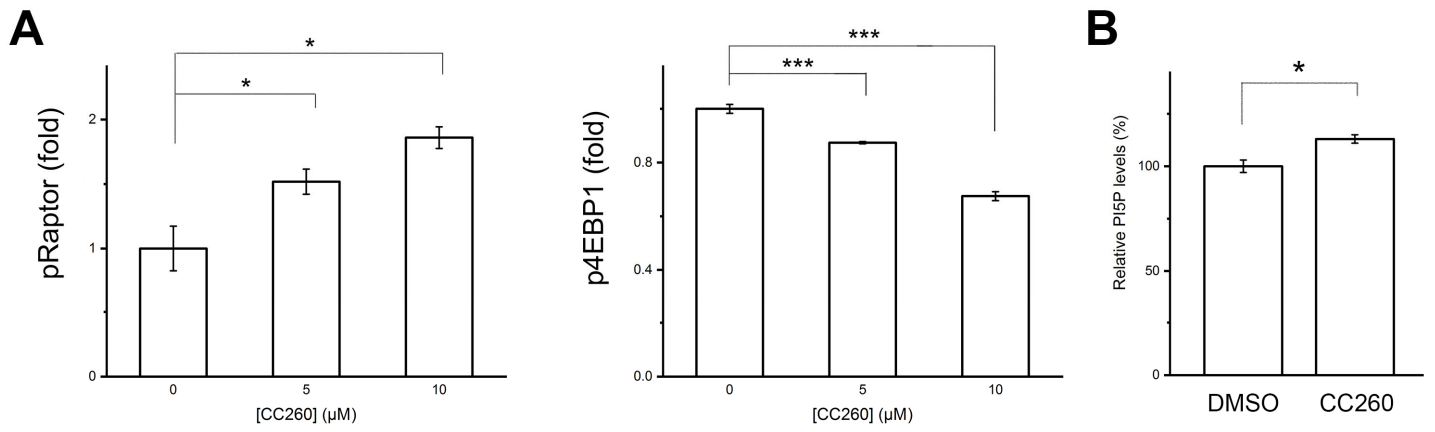

Figure S15



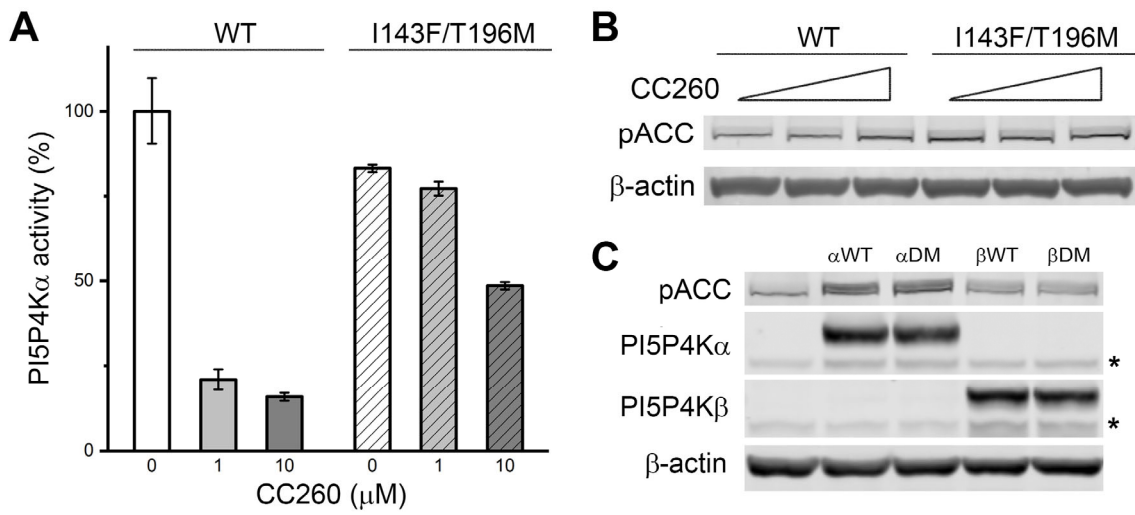

**Figure S16**

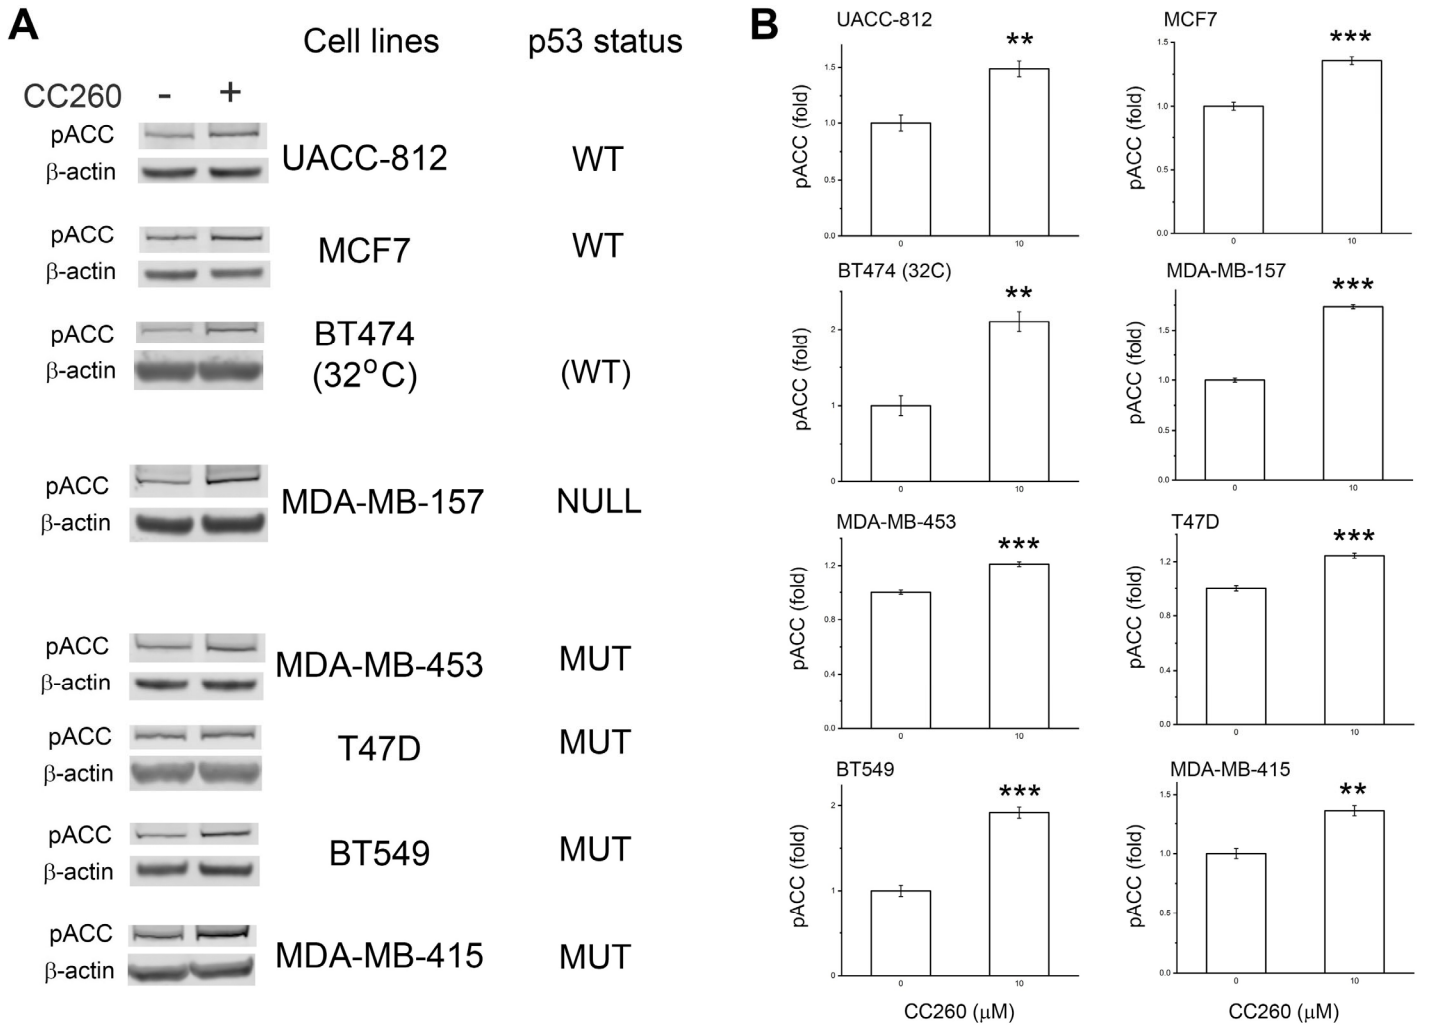

**Figure S17**

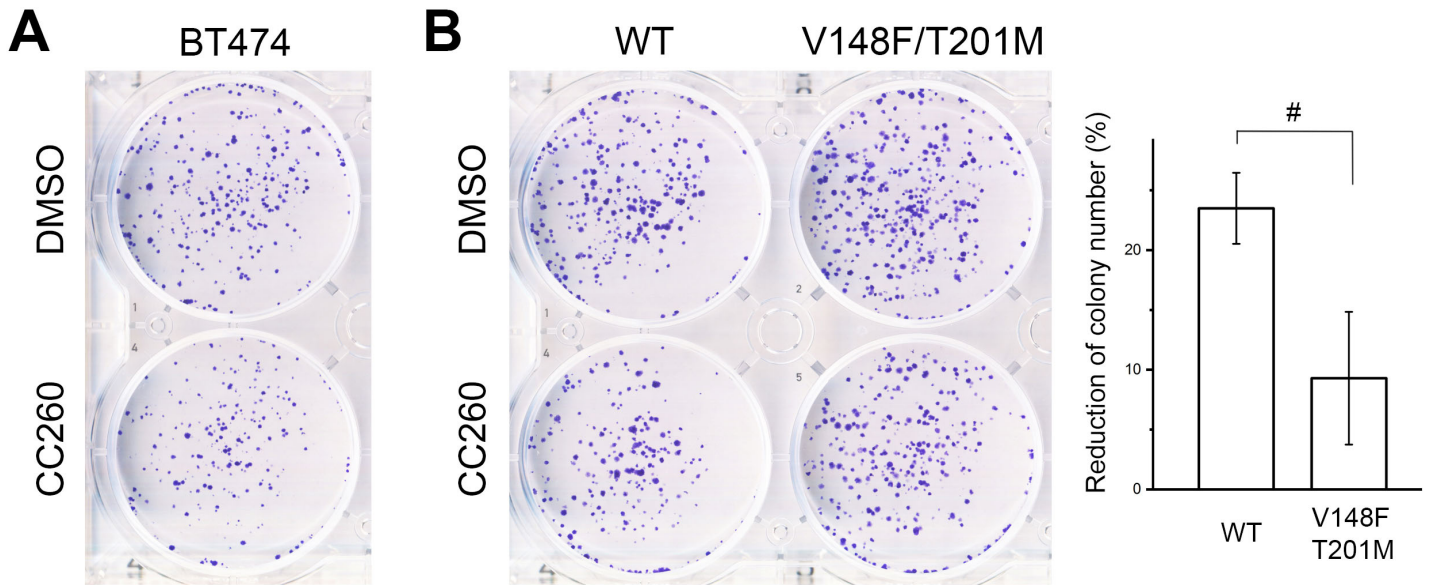

**Figure S18**

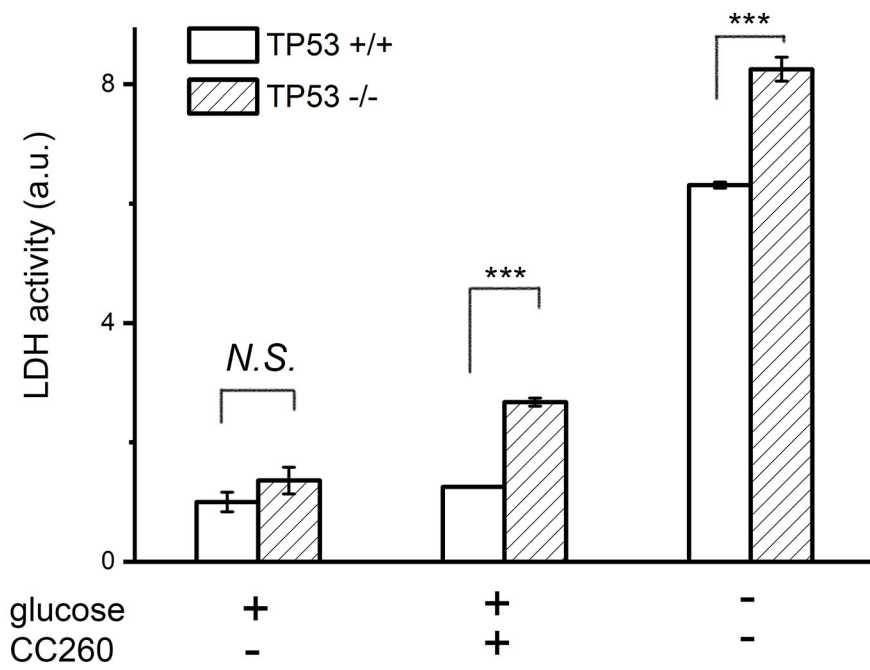

Figure S19

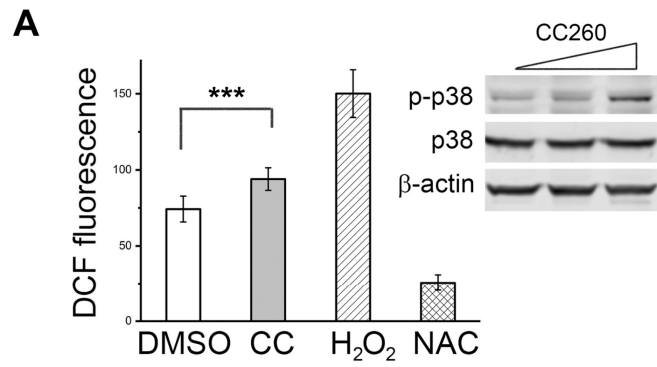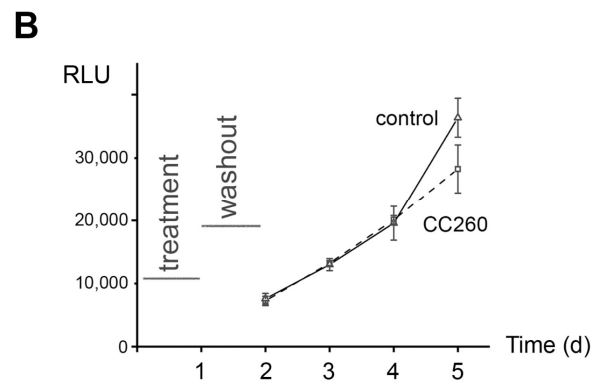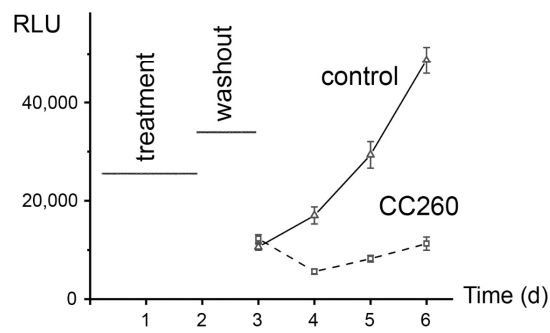

**Figure S20**

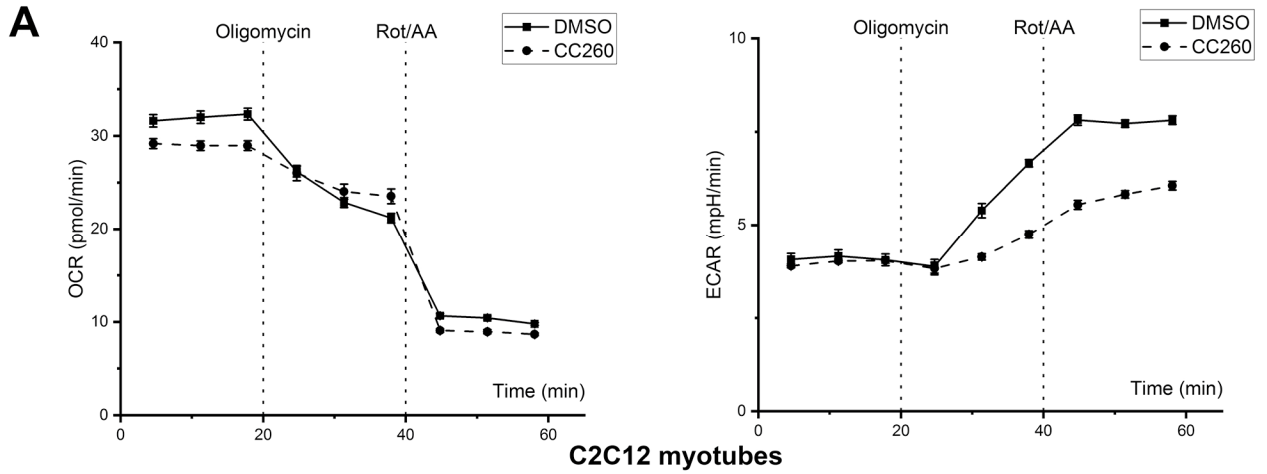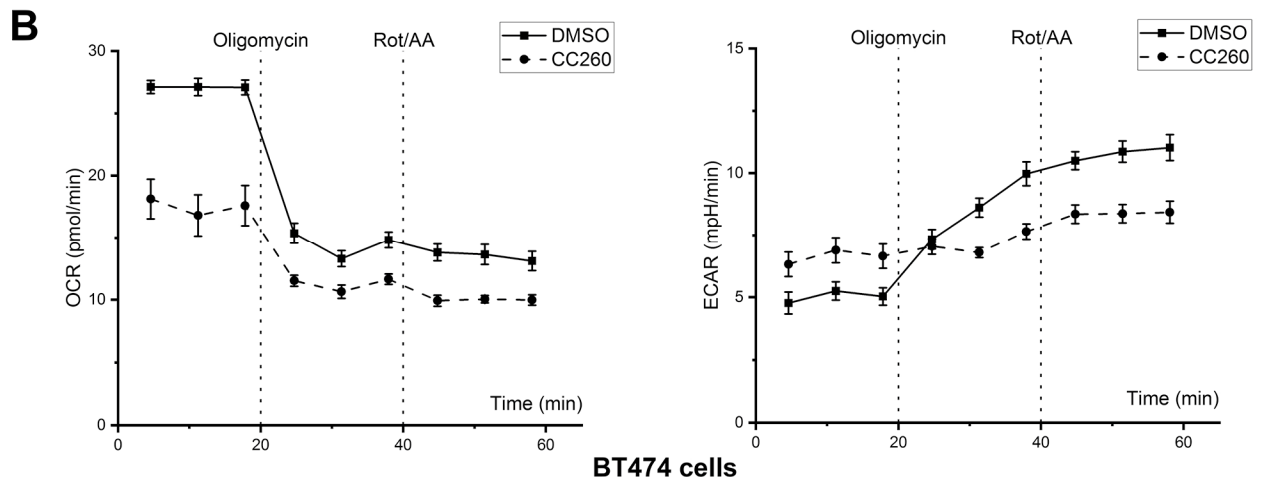

**Figure S21**
